# Supplementary material
Source: PubMed Central journal article supplement (PMC4957999)
Supplement: NIHMS791789-supplement-1.pdf [file NIHMS791789-supplement-1.pdf]

## Supplementary Data

Epithelial-to-mesenchymal transition defines feedback activation of receptor tyrosine kinase signaling induced by MEK inhibition in *KRAS* mutant lung cancer

Hidenori Kitai, Hiromichi Ebi, Shuta Tomida, Konstantinos V Floros, Hiroshi Kotani, Yuta Adachi, Satoshi Oizumi, Masaharu Nishimura, Anthony C Faber, Seiji Yano

- Supplementary Figures S1-S14
- Supplementary Tables S1-S5

**A**

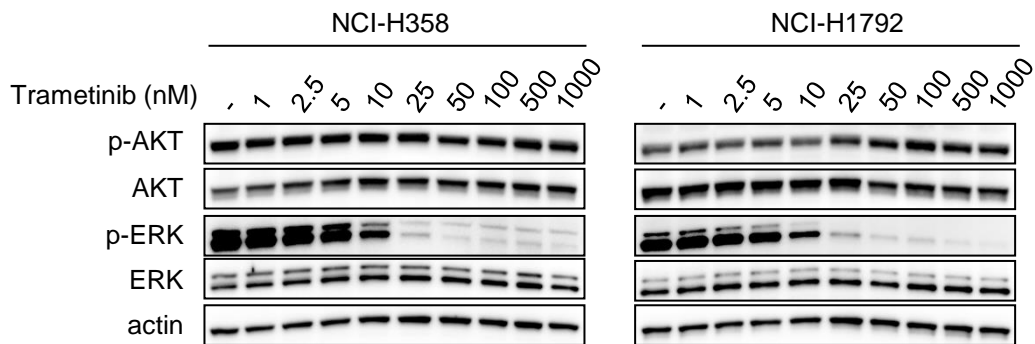

**B**

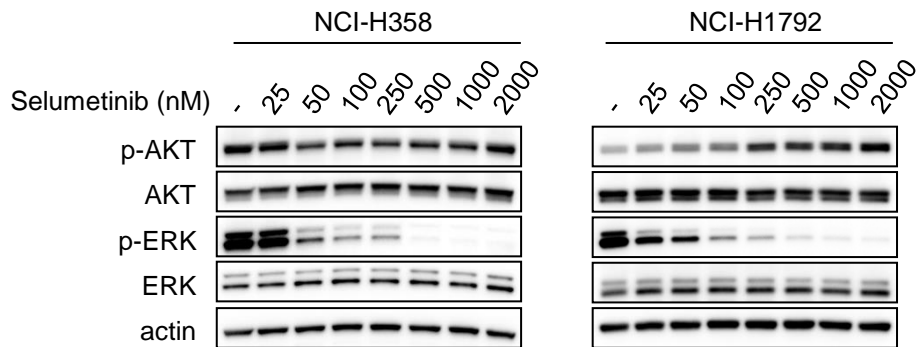

**C**

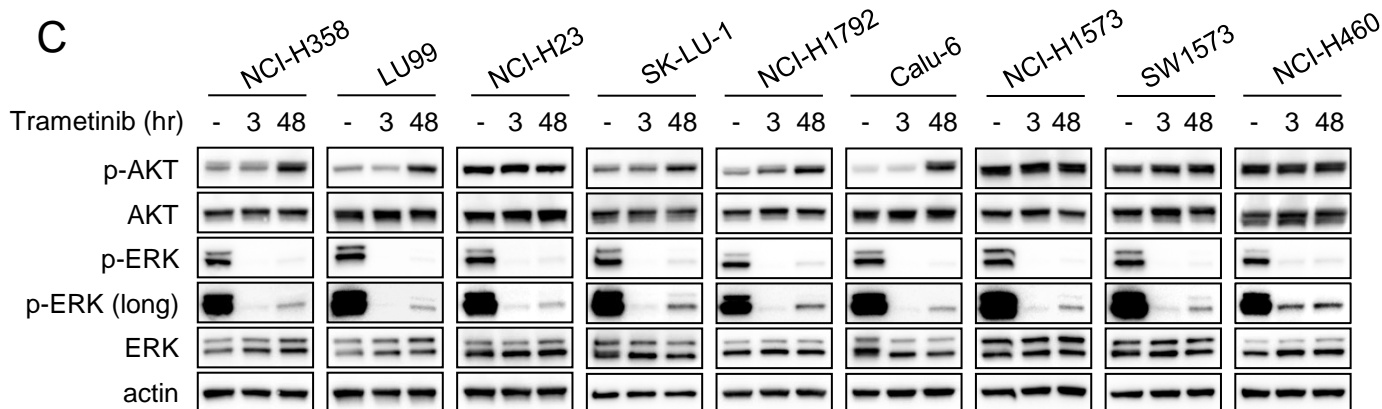

**D**

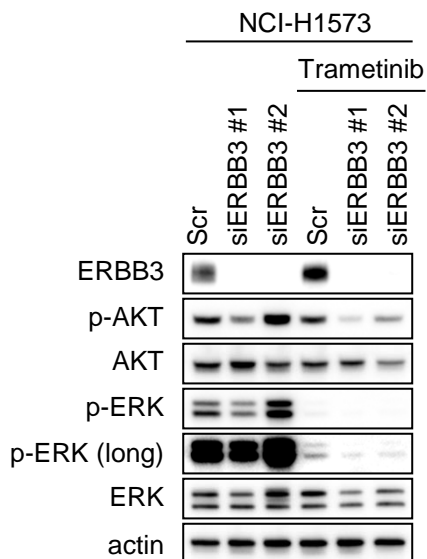

**E**

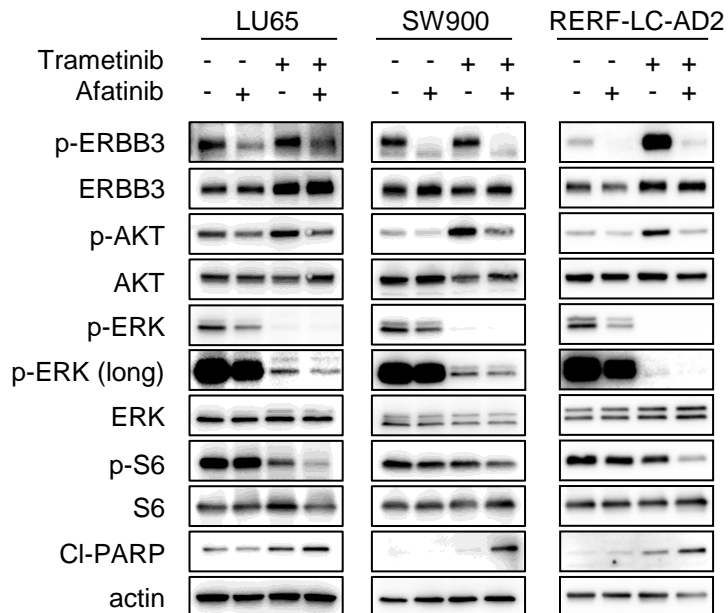

**Supplementary Figure S1. Feedback activation of ERK signaling and upregulation of AKT signaling following MEK inhibitor treatment in *KRAS* mutant lung cancers.**

**(A, B)** Trametinib (A) and Selumetinib (B) inhibit ERK phosphorylation in a dose-dependent manner. NCI-H358 and NCI-H1792 *KRAS* mutant cells were treated with the indicated drugs for 3 hours and probed with the indicated antibodies.

**(C)** *KRAS* mutant lung cancer cell lines were treated with 50 nM trametinib for 3 or 48 hours, and lysates were probed with the indicated antibodies.

**(D)** NCI-H1573 cells were transfected with two different siRNAs designed against ERBB3 or scramble siRNA and cultured for 48 hours. Afterwards, the media was replaced with or without 50 nM trametinib and cells were treated for an additional 72 hours. Lysates were probed with the indicated antibodies. All immunoblots are representative of three independent experiments.

**(E)** Cells were treated with 1 $\mu$ M of the pan-EGFR inhibitor afatinib, 50 nM trametinib, or the combination of these two drugs for 48 hours, and lysates were probed with the indicated antibodies.

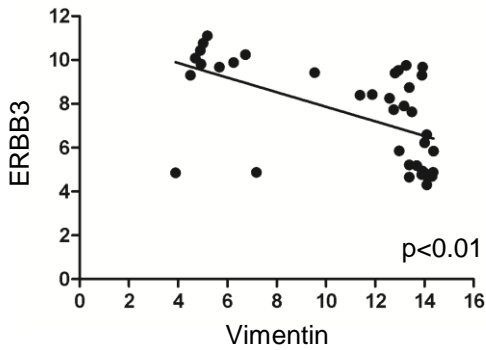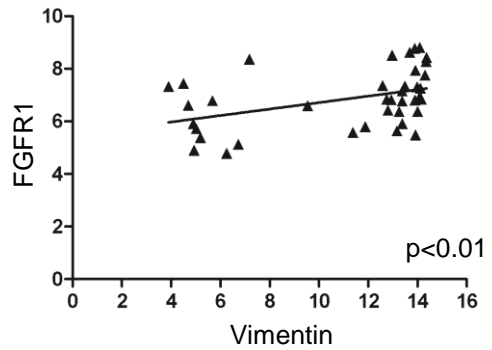

**Supplementary Figure S2.** Scattered plot analysis showing inverse relationship between ERBB3 and Vimentin and positive correlation between FGFR1 and Vimentin.  $p < 0.01$ , both by linear regression analysis. Axes are in  $\log_2$ .

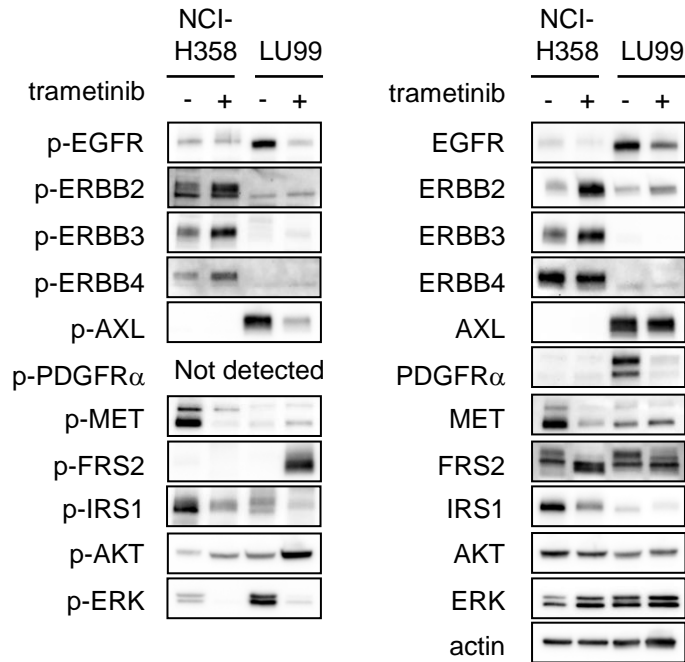

**Supplementary Figure S3. MEK inhibition promotes activation of FRS2 in mesenchymal-like *KRAS* mutant lung cancer cells.**

NCI-H358 epithelial-like cells and LU99 mesenchymal-like cells were treated with 50 nM trametinib for 72 hours. Cell lysates were immunoblotted with indicated antibodies.

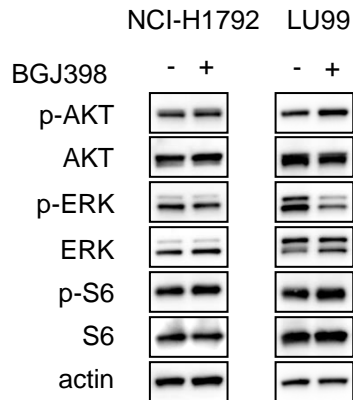

**Supplementary Figure S4. FGFR inhibition has minimal effect on downstream signaling in mesenchymal-like *KRAS* mutant cancer cell lines.**

A pan-FGFR inhibitor, NVP-BGJ398 (1 $\mu$ M), was used to treat NCI-H1792 and LU99 cells for 48 hours. Lysates were probed with the indicated antibodies. Independent experiments were performed three times, and a representative result is shown.

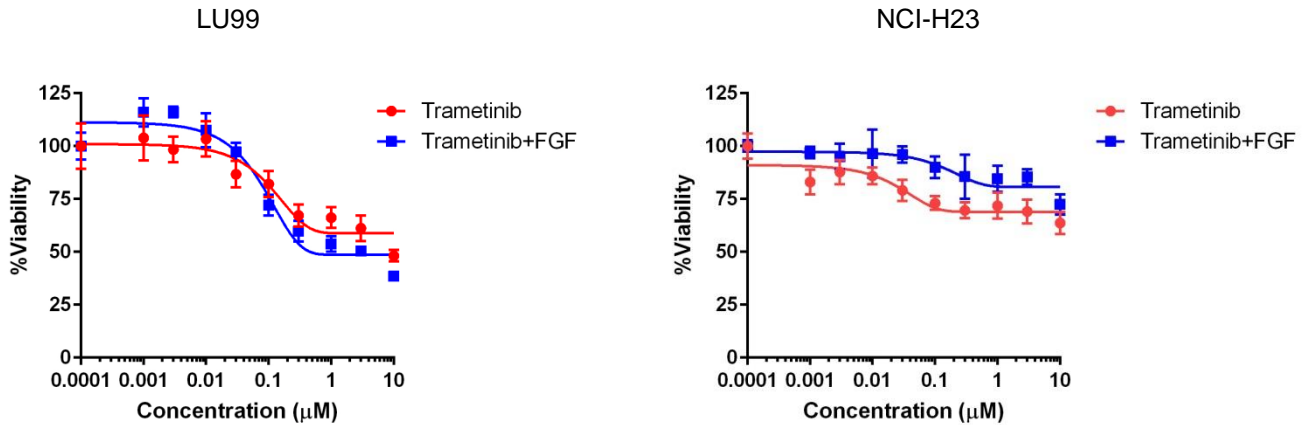

**Supplementary Figure S5. FGF modestly induces trametinib resistance in mesenchymal-like *KRAS* mutant lung cancer cell lines.**

LU99 and NCI-H23 cells were treated with indicated dose of trametinib in the absence or presence of 20 ng/mL of FGF2 for 72 hours. Error bars are  $\pm$  SD, n = 6. Independent experiments were performed twice and a representative result is shown. Note that FGF induced modest resistance under low dose trametinib treatment was consistently observed in LU99 cells. For the viability assays sparsely seeded cells were plated in a 96-well plate and the next day trametinib and FGF2 were added. 72 hours later, Cell Counting kit (Dojindo) was added per well and luminescence was recorded by iMark Microplate Reader (Bio-Rad).

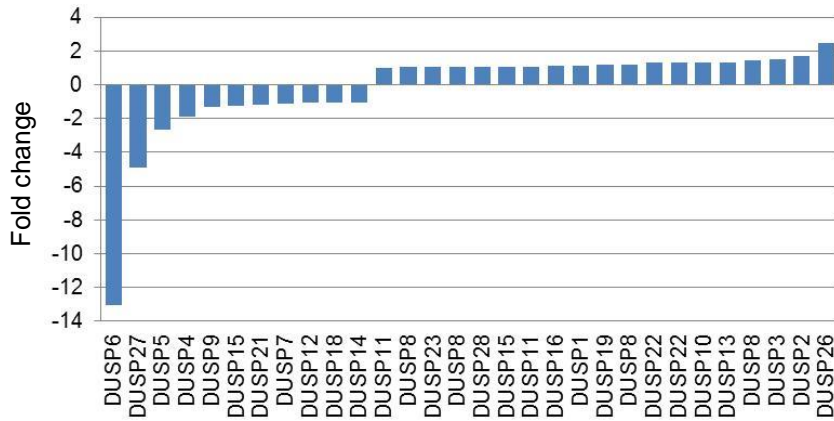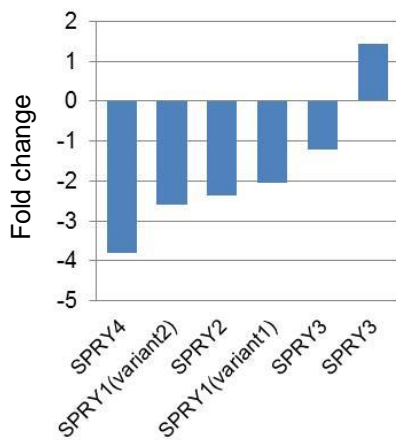

**Supplementary Figure S6. Results of microarray analysis showing strong suppression of DUSP6 and SPRY4 mRNA levels following trametinib treatment.**

NCI-H1792 cells were treated with trametinib for 48 hours. mRNA was extracted and analyzed as described in materials and methods section. Data were derived from average of two independents.



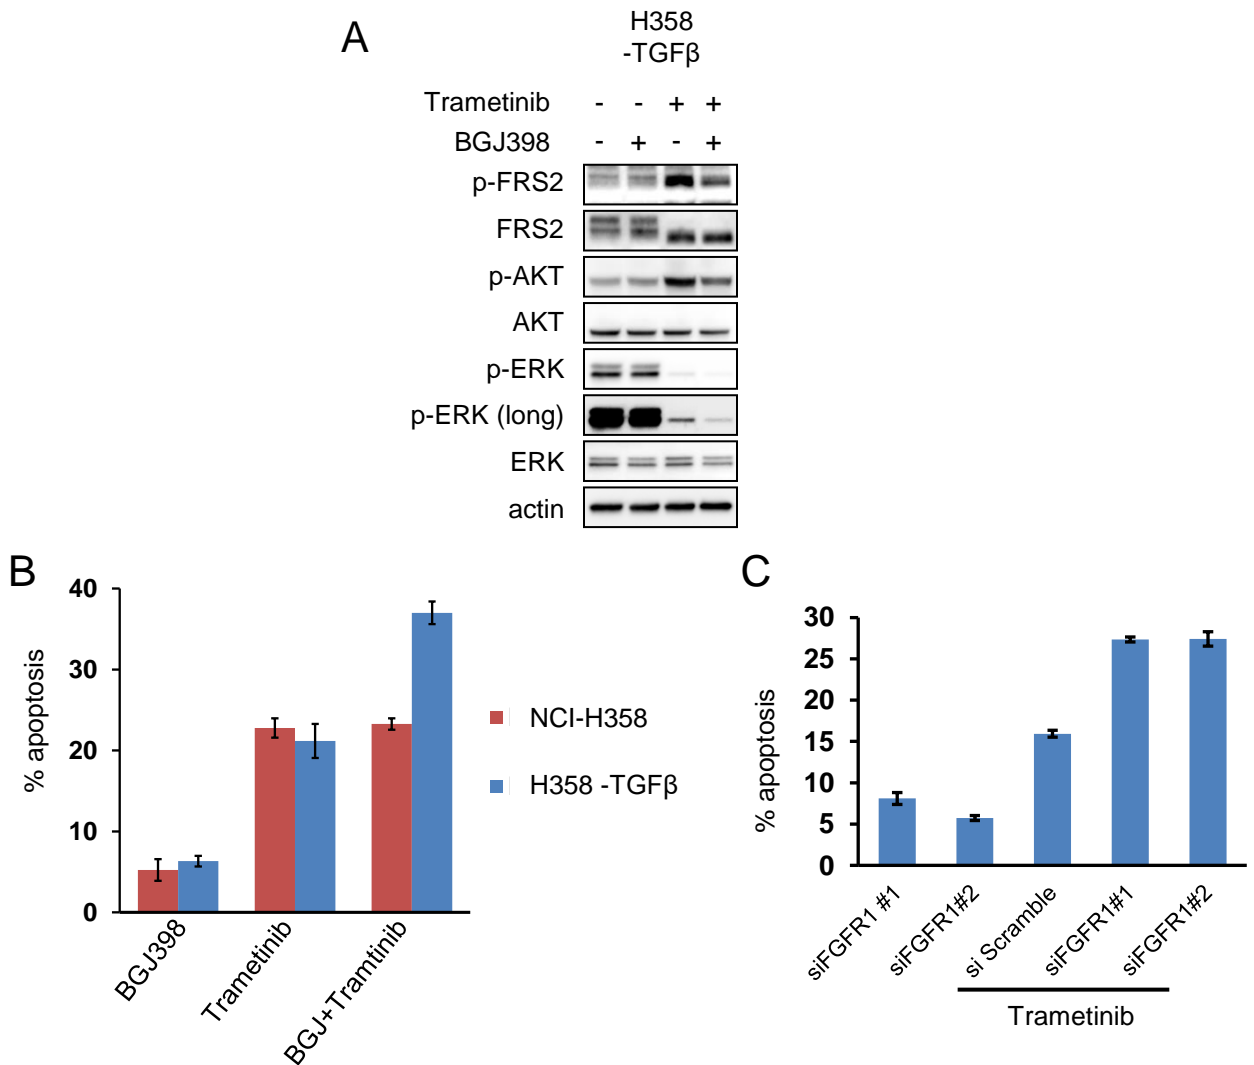

**Supplementary Figure S7. FGFR1-FRS2 pathway is involved in feedback activation of MAPK signaling in an EMT induced NCI-H358 epithelial-like *KRAS* mutant cancer cells.**

**(A)** NCI-H358 cells were treated with TGFβ1 (4 ng/mL) for 14 days in order to induce EMT. Then EMT-induced cells (H358-TGFβ) were treated with 1μM pan-FGFR inhibitor NVP-BGJ398, 50 nM trametinib, or the combination of these two drugs for 48 hours, and lysates were probed with the indicated antibodies. Independent experiments were performed three times, and a representative result is shown.

**(B)** NCI-H358 or H358-TGFβ were treated with 1μM pan-FGFR inhibitor NVP-BGJ398, 50 nM trametinib, or the combination of these two drugs for 72 hours and analyzed by FACS to quantify annexin V positive cells. The average ± SD of 3 independent experiments is shown.

**(C)** H358-TGFβ cells were transfected with two different siRNAs designed against FGFR1 or scramble siRNA and cultured for 48 hours. Afterwards, media was replaced with or without 50 nM trametinib and cells were treated for additional 48 hours. The percentage of cells undergoing apoptosis, as measured by annexin V positivity by FACS analysis, is shown relative to scramble siRNA transfected cells. The average ± SD of 3 independent experiments is shown.

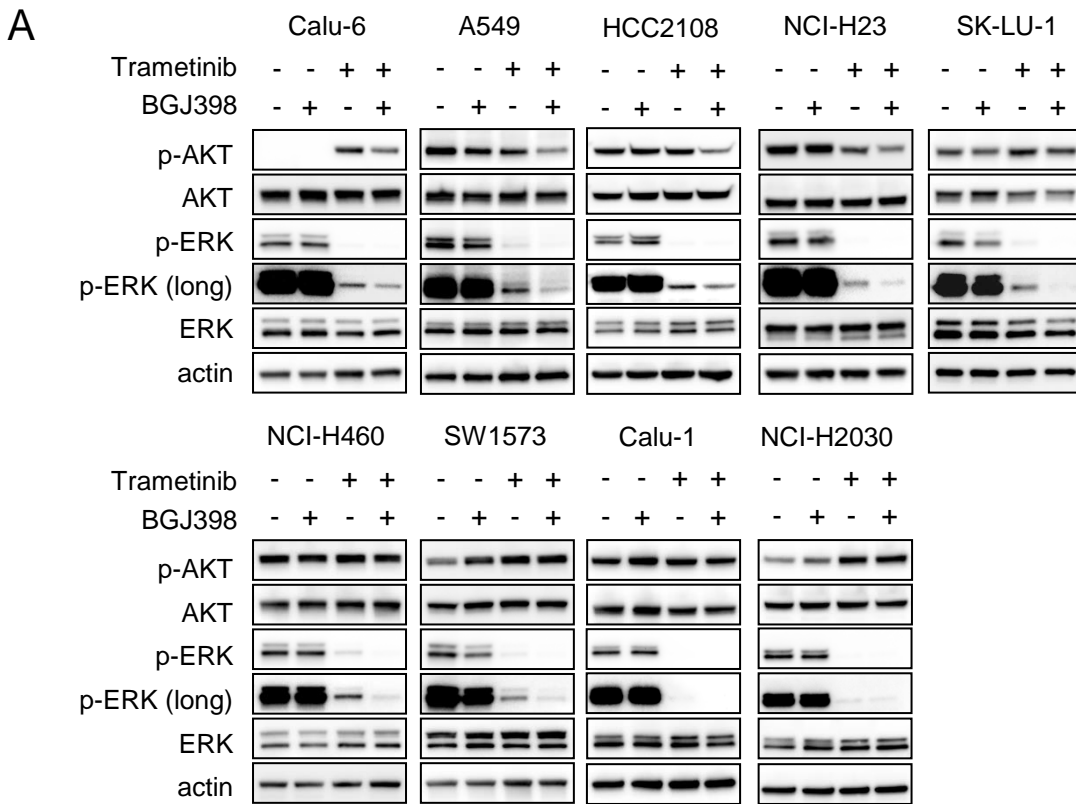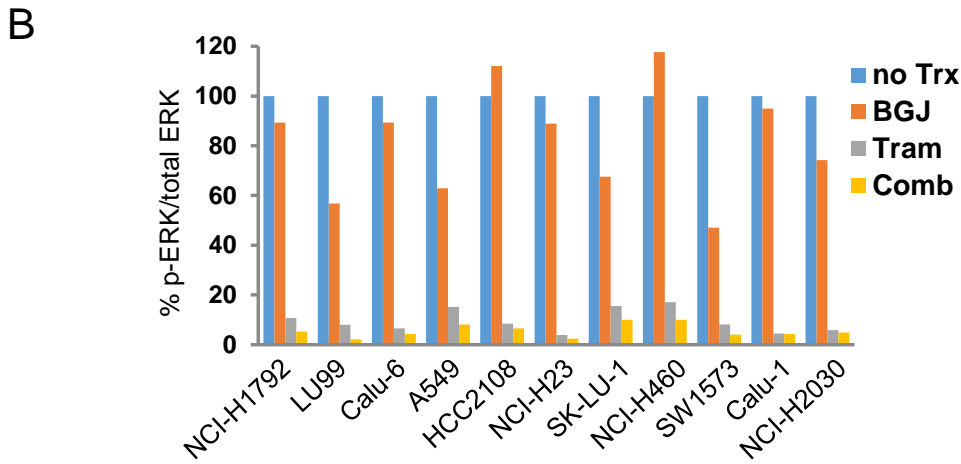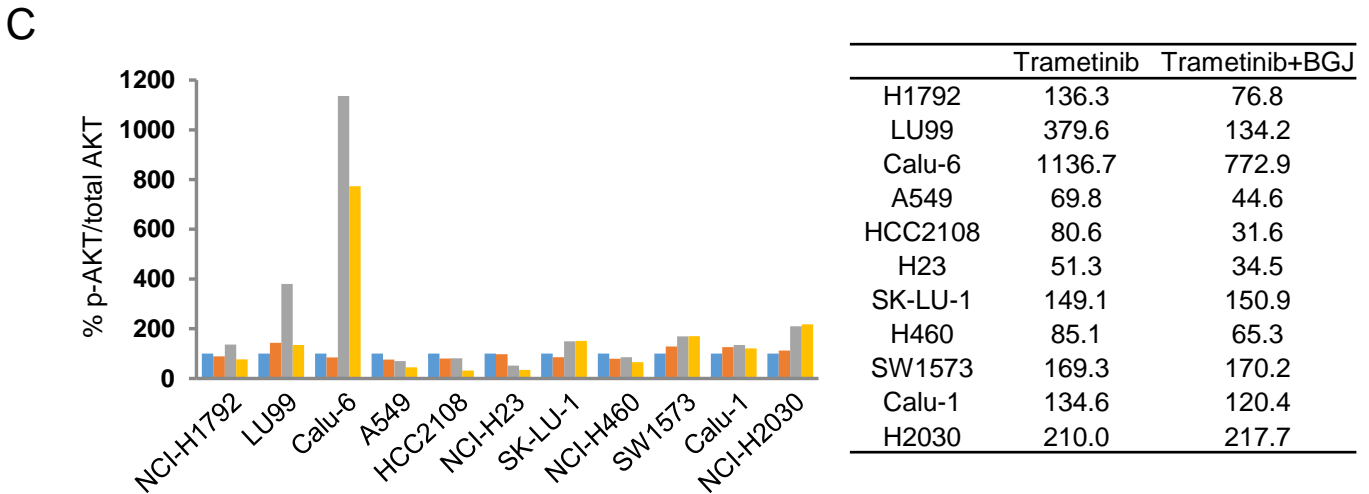

**D**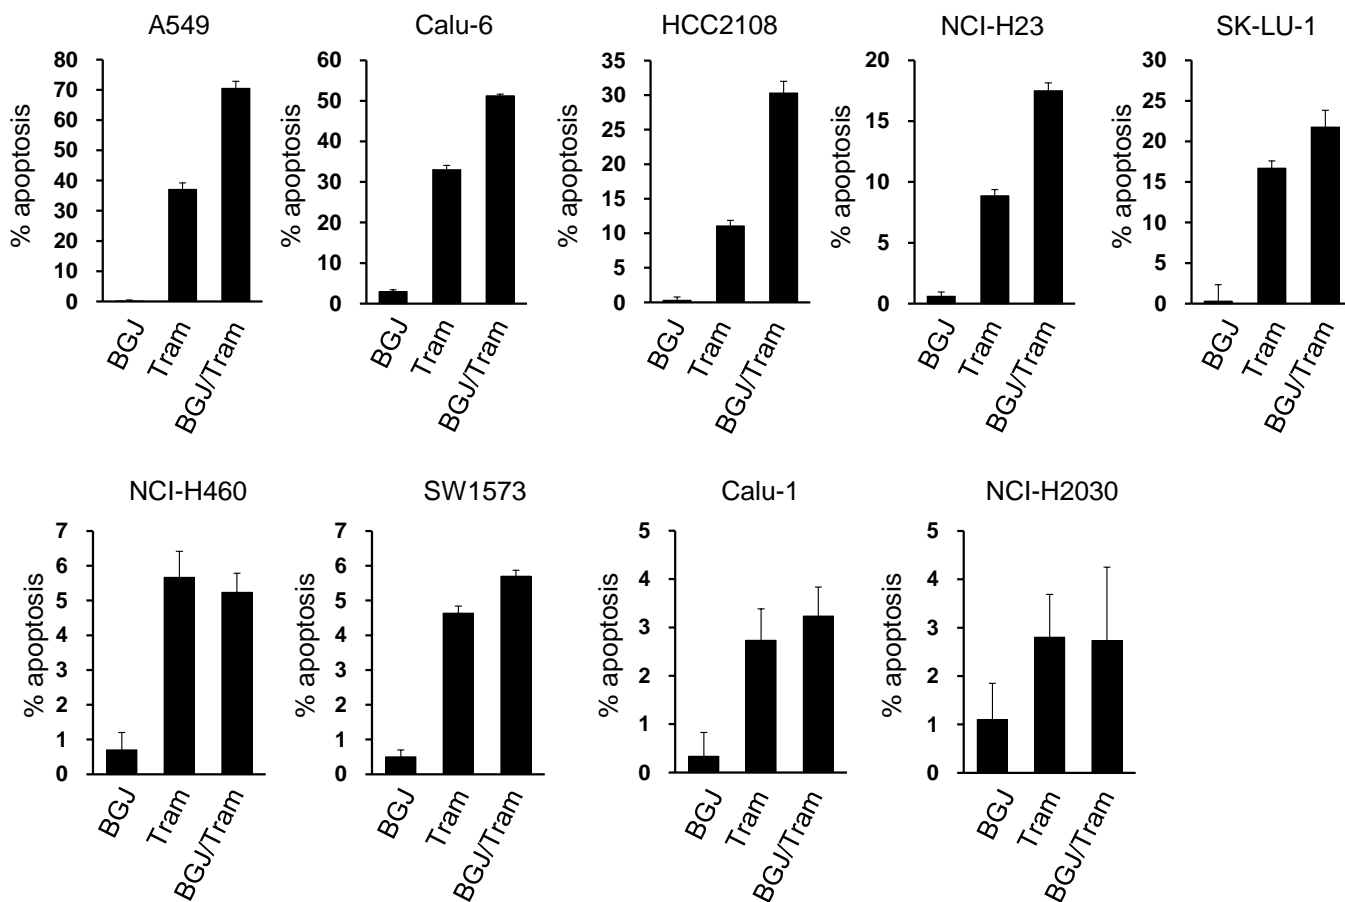

**Supplementary Figure S8. Combination of MEK inhibition with FGFR inhibition leads to further ERK suppression and apoptosis in mesenchymal-like *KRAS* mutant lung cancer cell lines.**

**(A)** Cells were treated with 1 $\mu$ M pan-FGFR inhibitor NVP-BGJ398, 50 nM trametinib, or the combination of these two drugs for 48 hours (SK-LU-1, NCI-H460, HCC2108, SW1573, and NCI-H2030) or 72 hours (A549, NCI-H23, Calu-6, and Calu-1), and lysates were probed with the indicated antibodies.

Independent experiments were performed three times, and a representative result is shown.

**(B, C)** The intensities of p-ERK (B) and p-AKT (C) following treatment with NVP-BGJ398, trametinib, or the combination of these drugs were quantified from each of the *KRAS* mutant cells (raw data in (A) and Figure 5A) and are presented as percentage relative to untreated cells.

**(D)** Cells were treated with drug and drug combinations as in (A) for 72 hours and analyzed by FACS to quantify annexin V positive cells. The average  $\pm$  SD of 3 independent experiments is shown.

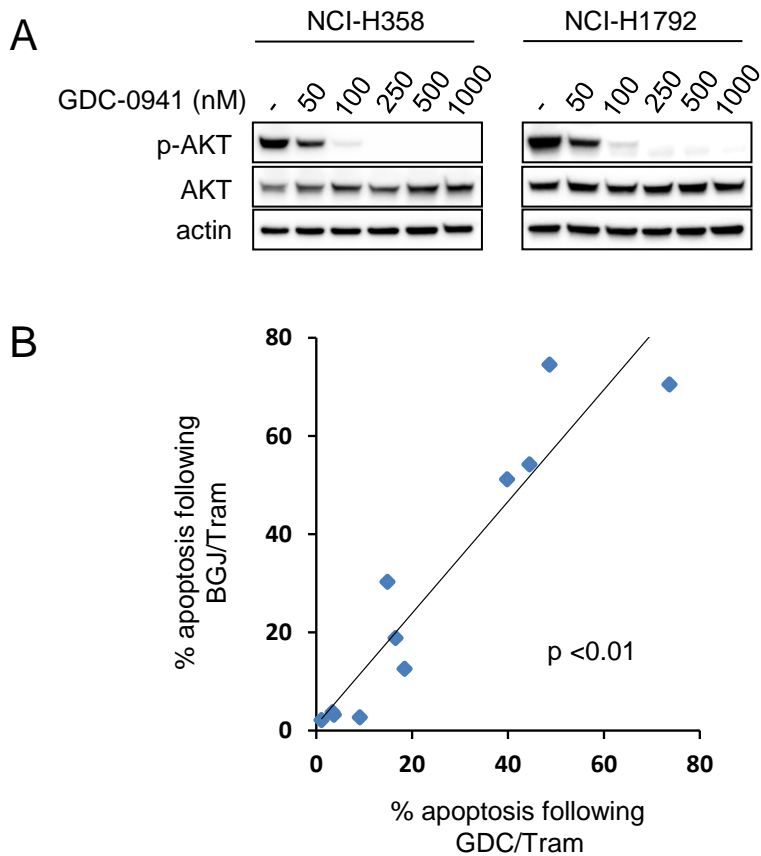

**Supplementary Figure S9. Magnitude of apoptosis induced by FGFR and MEK inhibition is related to that which is induced by PI3K and MEK inhibition in mesenchyma-like *KRAS* mutant lung cancer cell lines.**

**(A)** A PI3K inhibitor, GDC-0941, suppresses AKT phosphorylation in a dose-dependent manner. NCI-H358 and NCI-H1792 *KRAS* mutant cells were treated with the indicated drugs for 3 hours and probed with the indicated antibodies.

**(B)** Cells were treated with 50 nM trametinib and 250 nM GDC-0941 for 72 hours and analyzed by FACS to quantify annexin V positive cells. Cells were plotted for the amount of apoptosis induced by trametinib with GDC-0941 (x axis) and trametinib with NVP-BGJ398 determined in Fig. 5D and 5E and Supplementary Fig. S8D (Y axis).  $p < 0.01$ , by linear regression analysis.

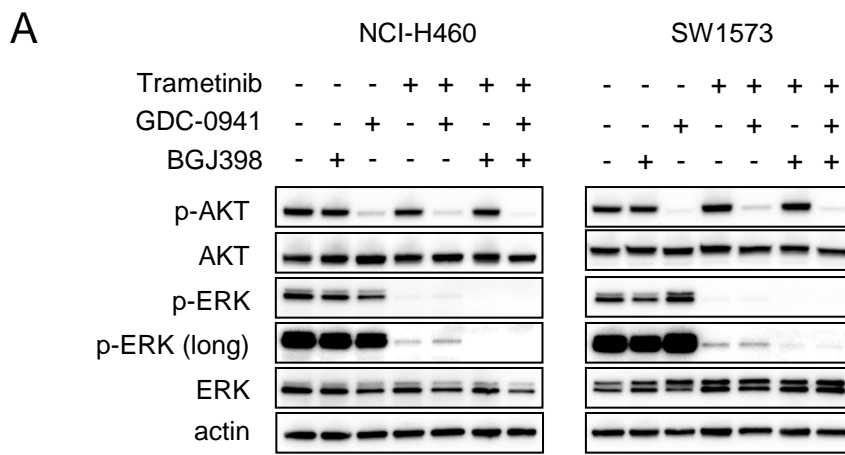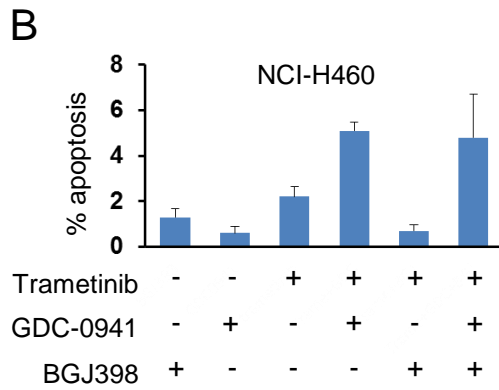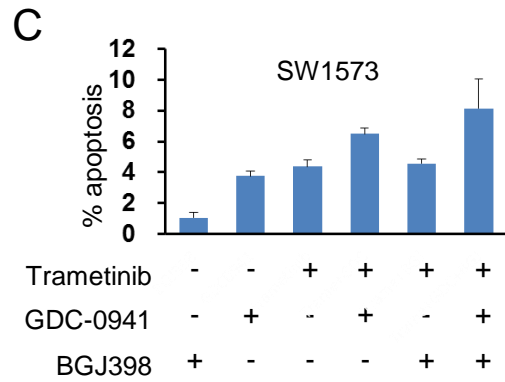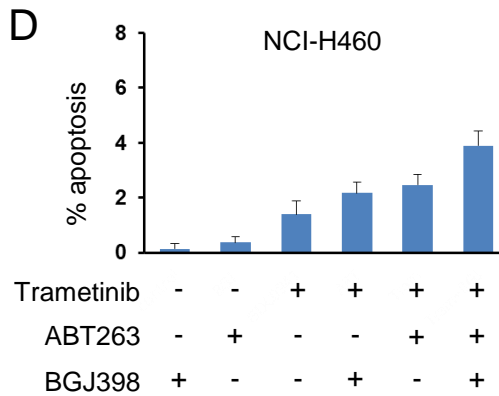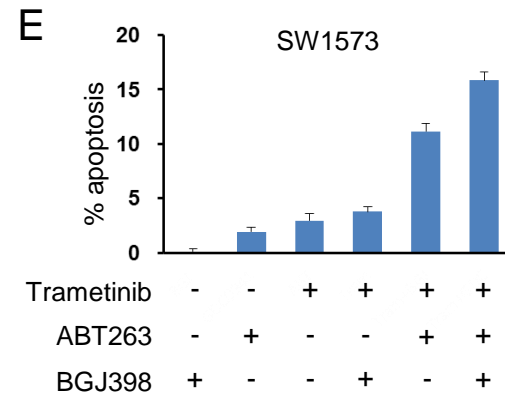

**Supplementary Figure S10. Suppression of both MAPK and PI3K signal is not enough to induce cell death in cells resistant to MEK inhibitor with FGFR inhibitor.**

**(A)** Cells were treated with 1uM pan-PI3K inhibitor GDC-0941, 50 nM trametinib, 1uM NVP-BGJ398 or the combination of each drug for 48 hours, and lysates were probed with the indicated antibodies. Independent experiments were performed three times, and a representative result is shown. The combination of these three drugs achieved suppression of both PI3K and MAPK signaling.

**(B, C)** Cells were treated with drug and drug combinations as in (A) for 72 hours and analyzed by FACS to quantify annexin V positive cells. The average  $\pm$  SD of 3 independent experiments is shown.

**(D, E)** Cells were treated with 50 nM trametinib, 1uM NVP-BGJ398, 100 nM ABT-263 or the combination of each drug for 72 hours and analyzed by FACS to quantify annexin V positive cells. The average  $\pm$  SD of 3 independent experiments is shown.

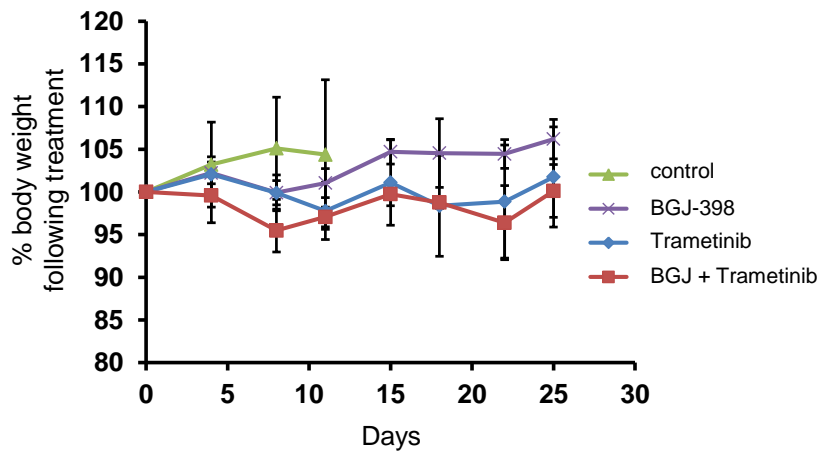

**Supplementary Figure S11. Combination of trametinib with NVP-BGJ398 was tolerable in a mouse xenograft model.**

Average body weights of LU99 xenograft bearing mice treated with NVP-BGJ398 (15 mg/kg daily), trametinib (0.6 mg/kg daily), or the combination of these drugs are shown relative to starting body weight. Error bars represent SD.

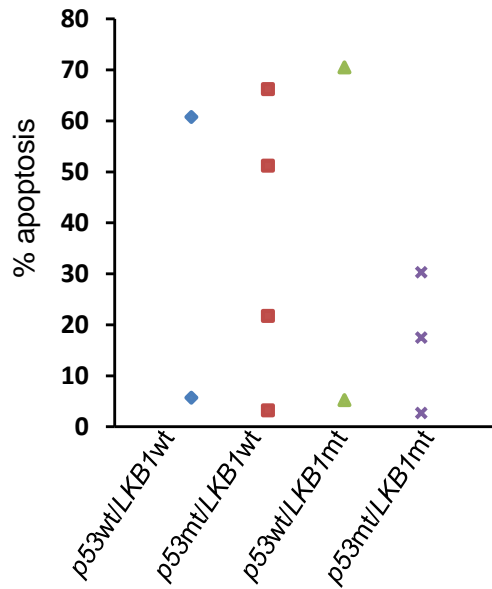

**Supplementary Figure S12. No relationship between sensitivity to combination of FGFR inhibitor with trametinib and mutations in *p53* and/or *LKB1* in mesenchymal-like *KRAS* mutant cancers.**

Raw data for apoptosis induced by trametinib with NVP-BGJ398 was shown in Fig. 5D, 5E, and Supplementary Fig. S8D.

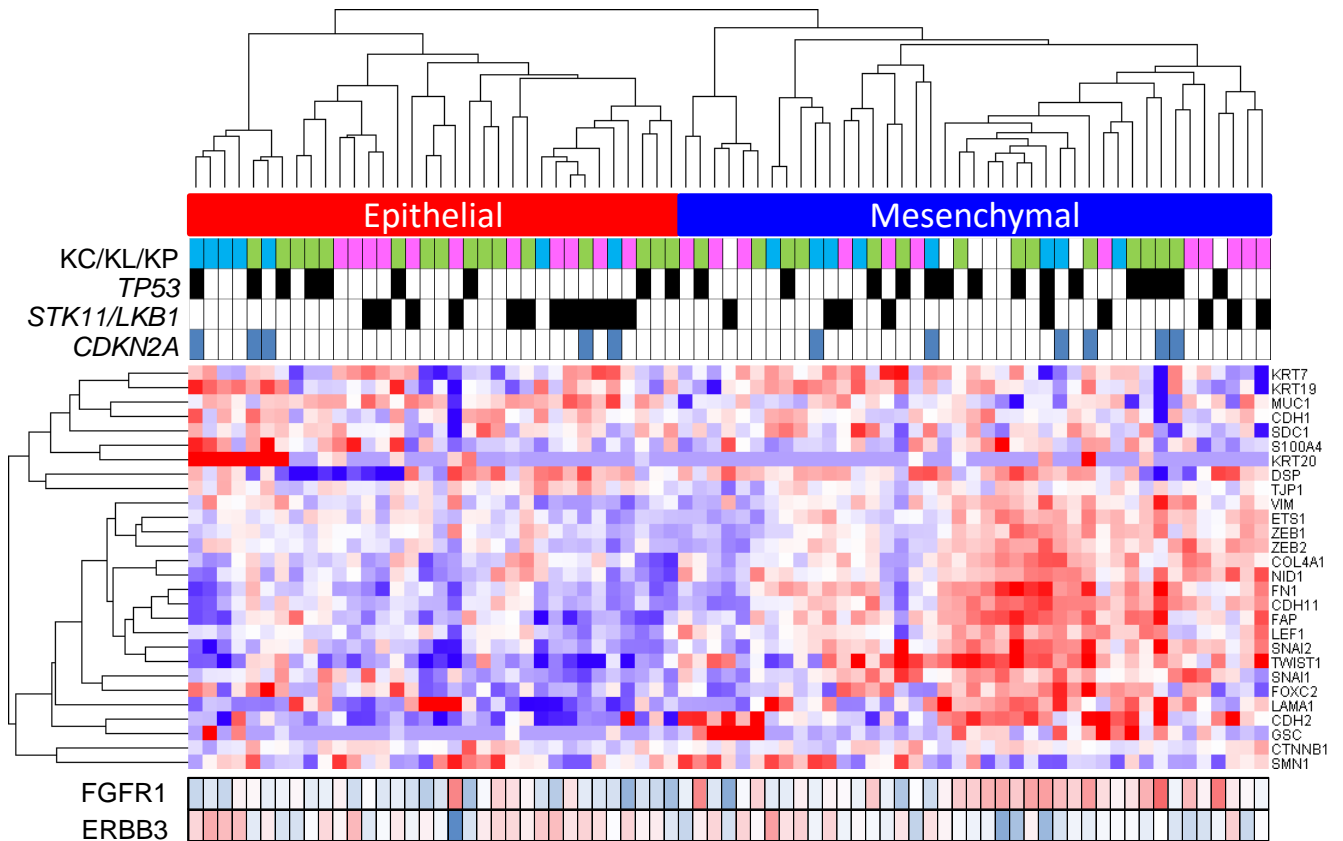

**Supplementary Figure S13. No relationship between EMT and subgroups of *KRAS* mutant lung adenocarcinoma defined by a previous study.**

Unsupervised hierarchical clustering of 75 *KRAS* mutant adenocarcinoma extracted from the TCGA dataset was shown using 28 genes listed as EMT related genes by Kalluri and Weinberg (Ref. 35). Major subsets of *KRAS*-mutant lung adenocarcinoma, such as KC (blue), KL (pink), and KP (green), were defined by Skoulidis et al. (Ref. 13) for 68 early-stage *KRAS* mutant lung adenocarcinomas from TCGA dataset (open box; data not available). Co-occurring mutational plot (black) for *TP53*, *STK11/LKB1* and homozygous loss of *CDKN2A* (blue) were obtained from supplementary data in Ref. 34.



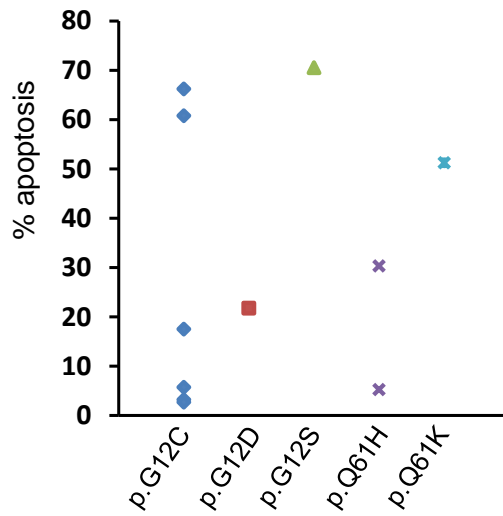

**Supplementary Figure S14. No relationship between sensitivity to combination of FGFR inhibitor with trametinib and amino acid substitutions in KRAS in mesenchymal-like *KRAS* mutant cancers.**

Raw data for apoptosis induced by trametinib with NVP-BGJ398 was shown in Fig. 5D, 5E, and Supplementary Fig. S8D.

# Supplementary Table S1. Differentially expressed genes following EMT in the NCI-H358 cell line

Down\_100

| Rank | ProbeName     | UniGeneID | GeneSymbol   | Fold Change_H358-TGF $\beta$ _vs_H358 (log-based) | GeneName                                                          | Ref Seq Accession |
|------|---------------|-----------|--------------|---------------------------------------------------|-------------------------------------------------------------------|-------------------|
| 1    | A_23_P153964  | Hs.1735   | INHBB        | -9.98                                             | inhibin, beta B                                                   | NM_002193         |
| 2    | A_33_P3303810 | Hs.519035 | LAD1         | -7.35                                             | ladinin 1                                                         | NM_005558         |
| 3    | A_23_P214267  | Hs.733762 | GPR110       | -7.30                                             | G protein-coupled receptor 110                                    | NM_153840         |
| 4    | A_23_P2674    | Hs.654610 | KRT4         | -6.94                                             | keratin 4                                                         | NM_002272         |
| 5    | A_23_P60130   | Hs.201083 | MAL2         | -6.85                                             | mal, T-cell differentiation protein 2 (gene/pseudogene)           | NM_052886         |
| 6    | A_23_P31407   | Hs.530009 | AGR2         | -6.82                                             | anterior gradient 2                                               | NM_006408         |
| 7    | A_23_P58266   | Hs.2962   | S100P        | -6.69                                             | S100 calcium binding protein P                                    | NM_005980         |
| 8    | A_23_P139687  | Hs.162143 | ERP27        | -6.62                                             | endoplasmic reticulum protein 27                                  | NM_152321         |
| 9    | A_23_P393051  | Hs.188881 | KDF1         | -6.60                                             | keratinocyte differentiation factor 1                             | NM_152365         |
| 10   | A_23_P140434  | Hs.487036 | MYO5C        | -6.53                                             | myosin VC                                                         | NM_018728         |
| 11   | A_23_P143348  | Hs.710157 | OVOL2        | -6.51                                             | ovo-like zinc finger 2                                            | NM_021220         |
| 12   | A_23_P205959  | Hs.459538 | ALDH1A3      | -6.33                                             | aldehyde dehydrogenase 1 family, member A3                        | NM_000693         |
| 13   | A_24_P365515  | Hs.155651 | FOXA2        | -6.27                                             | forkhead box A2                                                   | NM_021784         |
| 14   | A_32_P206899  | Hs.367649 | DNAH2        | -6.24                                             | dynein, axonemal, heavy chain 2                                   | NM_020877         |
| 15   | A_33_P3372074 | Hs.514477 | LLGL2        | -6.07                                             | lethal giant larvae homolog 2 (Drosophila)                        | NM_001031803      |
| 16   | A_23_P78543   | Hs.18894  | AP1M2        | -5.84                                             | adaptor-related protein complex 1, mu 2 subunit                   | NM_005498         |
| 17   | A_33_P3228460 | Hs.301350 | FXYD3        | -5.84                                             | FXD domain containing ion transport regulator 3                   | NM_001136007      |
| 18   | A_32_P218355  | Hs.444277 | C6orf132     | -5.52                                             | chromosome 6 open reading frame 132                               | NM_001164446      |
| 19   | A_33_P3256391 | Hs.150319 | CRB3         | -5.52                                             | crumbs family member 3                                            | NM_139161         |
| 20   | A_23_P149529  | Hs.23582  | TACSTD2      | -5.47                                             | tumor-associated calcium signal transducer 2                      | NM_002353         |
| 21   | A_23_P9293    | Hs.50382  | TJP2         | -5.34                                             | tight junction protein 2                                          | NM_004817         |
| 22   | A_33_P3415191 | Hs.216623 | ATP8B1       | -5.28                                             | ATPase, aminophospholipid transporter, class I, type 8B, member 1 | NM_005603         |
| 23   | A_33_P3422133 | Hs.602573 | ADAP1        | -5.15                                             | ArfGAP with dual PH domains 1                                     | NM_006869         |
| 24   | A_33_P3215948 | Hs.116651 | MPZL2        | -5.14                                             | myelin protein zero-like 2                                        | NM_005797         |
| 25   | A_21_P0010596 |           | RNF223       | -5.10                                             | ring finger protein 223                                           |                   |
| 26   | A_23_P130027  | Hs.670090 | EPN3         | -5.09                                             | epsin 3                                                           | NM_017957         |
| 27   | A_32_P134968  | Hs.417303 | SPTB         | -5.04                                             | spectrin, beta, erythrocytic                                      | NM_001024858      |
| 28   | A_23_P349416  | Hs.118681 | ERBB3        | -5.01                                             | v-erb-b2 avian erythroblastic leukemia viral oncogene homolog 3   | NM_001982         |
| 29   | A_23_P161439  | Hs.642660 | ADIRF        | -4.99                                             | adipogenesis regulatory factor                                    | NM_006829         |
| 30   | A_23_P206359  | Hs.461086 | CDH1         | -4.87                                             | cadherin 1, type 1, E-cadherin (epithelial)                       | NM_004360         |
| 31   | A_23_P41344   | Hs.115263 | EREG         | -4.85                                             | epiregulin                                                        | NM_001432         |
| 32   | A_33_P3420545 | Hs.13285  | KCNV1        | -4.81                                             | potassium channel, subfamily V, member 1                          | NM_014379         |
| 33   | A_23_P257111  | Hs.494496 | FBP1         | -4.75                                             | fructose-1,6-bisphosphatase 1                                     | NM_000507         |
| 34   | A_33_P3419190 | Hs.270833 | AREG         | -4.75                                             | amphiregulin                                                      | NM_001657         |
| 35   | A_23_P259071  | Hs.270833 | AREG         | -4.73                                             | amphiregulin                                                      | NM_001657         |
| 36   | A_23_P41804   | Hs.240951 | NKD2         | -4.72                                             | naked cuticle homolog 2 (Drosophila)                              | NM_033120         |
| 37   | A_24_P48057   | Hs.435730 | IRX5         | -4.70                                             | iroquois homeobox 5                                               | NM_005853         |
| 38   | A_23_P160167  | Hs.38972  | TSPAN1       | -4.69                                             | tetraspanin 1                                                     | NM_005727         |
| 39   | A_23_P210210  | Hs.468410 | EPAS1        | -4.65                                             | endothelial PAS domain protein 1                                  | NM_001430         |
| 40   | A_24_P135748  | Hs.745043 | GRTP1        | -4.64                                             | grow th hormone regulated TBC protein 1                           | NM_024719         |
| 41   | A_33_P3265855 | Hs.102336 | PRR5-ARHGAP8 | -4.64                                             | PRR5-ARHGAP8 readthrough                                          | NM_181334         |
| 42   | A_23_P124619  | Hs.288998 | S100A14      | -4.63                                             | S100 calcium binding protein A14                                  | NM_020672         |
| 43   | A_33_P3229107 | Hs.510543 | MIR205HG     | -4.54                                             | MIR205 host gene (non-protein coding)                             | NM_001104548      |
| 44   | A_23_P119943  | Hs.438102 | IGFBP2       | -4.52                                             | insulin-like grow th factor binding protein 2, 36kDa              | NM_000597         |
| 45   | A_33_P3366336 | Hs.97837  | SBK1         | -4.49                                             | SH3 domain binding kinase 1                                       | NM_001024401      |
| 46   | A_33_P3303649 | Hs.517586 | MB           | -4.45                                             | myoglobin                                                         | NM_203377         |
| 47   | A_23_P1962    | Hs.17466  | RARRES3      | -4.44                                             | retinoic acid receptor responder (tazarotene induced) 3           | NM_004585         |
| 48   | A_23_P81158   | Hs.654537 | ADH1C        | -4.41                                             | alcohol dehydrogenase 1C (class I), gamma polypeptide             | NM_000669         |
| 49   | A_33_P3318668 | Hs.512469 | CYSRT1       | -4.41                                             | cysteine-rich tail protein 1                                      | NM_199001         |
| 50   | A_33_P3228450 | Hs.301350 | FXYD3        | -4.39                                             | FXD domain containing ion transport regulator 3                   | NM_001136007      |

|     |               |           |          |       |                                                                                                         |              |
|-----|---------------|-----------|----------|-------|---------------------------------------------------------------------------------------------------------|--------------|
| 51  | A_24_P307869  | Hs.514477 | LLGL2    | -4.39 | lethal giant larvae homolog 2 (Drosophila)                                                              | NM_001015002 |
| 52  | A_23_P15101   | Hs.115838 | TMC5     | -4.34 | transmembrane channel-like 5                                                                            | NM_024780    |
| 53  | A_24_P10137   | Hs.507866 | RGCC     | -4.30 | regulator of cell cycle                                                                                 | NM_014059    |
| 54  | A_32_P452655  | Hs.462402 | LGALS9C  | -4.30 | lectin, galactoside-binding, soluble, 9C                                                                | NM_001040078 |
| 55  | A_33_P3232504 | Hs.512469 | CYSRT1   | -4.29 | cysteine-rich tail protein 1                                                                            | NM_199001    |
| 56  | A_23_P202071  | Hs.309288 | CELF2    | -4.28 | CUGBP, Elav-like family member 2                                                                        | NM_001025077 |
| 57  | A_23_P78980   | Hs.69009  | B3GNT3   | -4.27 | UDP-GlcNAc:betaGal beta-1,3-N-acetylglucosaminyltransferase 3                                           | NM_014256    |
| 58  | A_23_P153372  | Hs.631617 | HSH2D    | -4.27 | hematopoietic SH2 domain containing                                                                     | NM_032855    |
| 59  | A_24_P280846  | Hs.532401 | GOLT1A   | -4.18 | golgi transport 1A                                                                                      | NM_198447    |
| 60  | A_24_P203056  | Hs.530970 | BCL7A    | -4.17 | B-cell CLL/lymphoma 7A                                                                                  | NM_020993    |
| 61  | A_23_P329573  | Hs.375957 | ITGB2    | -4.14 | integrin, beta 2 (complement component 3 receptor 3 and 4 subunit)                                      | NM_000211    |
| 62  | A_23_P897     | Hs.32417  | C1orf116 | -4.14 | chromosome 1 open reading frame 116                                                                     | NM_023938    |
| 63  | A_33_P3846653 | Hs.527883 | KRT19P2  | -4.12 | keratin 19 pseudogene 2                                                                                 | NR_036685    |
| 64  | A_23_P79803   | Hs.517029 | VSTM2L   | -4.11 | V-set and transmembrane domain containing 2 like                                                        | NM_080607    |
| 65  | A_23_P37127   | Hs.163484 | FOXA1    | -4.10 | forkhead box A1                                                                                         | NM_004496    |
| 66  | A_32_P63562   | Hs.659312 | MIG7     | -4.07 | mig-7                                                                                                   |              |
| 67  | A_33_P3274935 | Hs.11067  | HID1     | -4.07 | HID1 domain containing                                                                                  | NM_030630    |
| 68  | A_33_P3365193 | Hs.655232 | AMY1C    | -4.06 | amylase, alpha 1C (salivary)                                                                            | NM_001008219 |
| 69  | A_23_P127663  | Hs.471695 | PRRG4    | -4.05 | proline rich Gla (G-carboxyglutamic acid) 4 (transmembrane)                                             | NM_024081    |
| 70  | A_23_P256312  | Hs.517973 | MST1R    | -4.05 | macrophage stimulating 1 receptor (c-met-related tyrosine kinase)                                       | NM_002447    |
| 71  | A_23_P56978   | Hs.51133  | PTK6     | -4.05 | protein tyrosine kinase 6                                                                               | NM_005975    |
| 72  | A_24_P329487  | Hs.741352 | FAM84B   | -4.04 | family with sequence similarity 84, member B                                                            | NM_174911    |
| 73  | A_33_P3383326 | Hs.126667 | LPAR1    | -4.03 | lysophosphatidic acid receptor 1                                                                        | NM_057159    |
| 74  | A_23_P207850  | Hs.438292 | TNS4     | -4.02 | tensin 4                                                                                                | NM_032865    |
| 75  | A_23_P115022  | Hs.104476 | TMEM125  | -4.01 | transmembrane protein 125                                                                               | NM_144626    |
| 76  | A_23_P100220  | Hs.592053 | ESRP2    | -4.01 | epithelial splicing regulatory protein 2                                                                | NM_024939    |
| 77  | A_33_P3474319 | Hs.352661 | SLC37A2  | -3.98 | solute carrier family 37 (glucose-6-phosphate transporter), member 2                                    | NM_198277    |
| 78  | A_33_P3329088 | Hs.75799  | PRSS8    | -3.98 | protease, serine, 8                                                                                     | NM_002773    |
| 79  | A_23_P16523   | Hs.616962 | GDF15    | -3.98 | growth differentiation factor 15                                                                        | NM_004864    |
| 80  | A_23_P74112   | Hs.221375 | IFNLR1   | -3.97 | interferon, lambda receptor 1                                                                           | NM_170743    |
| 81  | A_23_P64828   | Hs.524760 | OAS1     | -3.95 | 2'-5'-oligoadenylate synthetase 1, 40/46kDa                                                             | NM_002534    |
| 82  | A_23_P218675  | Hs.2719   | WFDC2    | -3.95 | WAP four-disulfide core domain 2                                                                        | NM_006103    |
| 83  | A_23_P150379  | Hs.116651 | MPZL2    | -3.95 | myelin protein zero-like 2                                                                              | NM_144765    |
| 84  | A_23_P30126   | Hs.1690   | FGFBP1   | -3.95 | fibroblast growth factor binding protein 1                                                              | NM_005130    |
| 85  | A_24_P66027   | Hs.226307 | APOBEC3B | -3.94 | apolipoprotein B mRNA editing enzyme, catalytic polypeptide-like 3B                                     | NM_004900    |
| 86  | A_33_P3249748 | Hs.368402 | THEM6    | -3.93 | thioesterase superfamily member 6                                                                       | NM_016647    |
| 87  | A_23_P205370  | Hs.510327 | ASB2     | -3.93 | ankyrin repeat and SOCS box containing 2                                                                | NM_016150    |
| 88  | A_23_P160881  | Hs.123659 | SMPDL3B  | -3.92 | sphingomyelin phosphodiesterase, acid-like 3B                                                           | NM_001009568 |
| 89  | A_33_P3309075 | Hs.442657 | TBC1D8   | -3.88 | TBC1 domain family, member 8 (with GRAM domain)                                                         | NM_001102426 |
| 90  | A_23_P201551  | Hs.267659 | VAV3     | -3.87 | vav 3 guanine nucleotide exchange factor                                                                | NM_006113    |
| 91  | A_33_P3244274 | Hs.512767 | RNF208   | -3.85 | ring finger protein 208                                                                                 |              |
| 92  | A_23_P216468  | Hs.444915 | SLC1A1   | -3.81 | solute carrier family 1 (neuronal/epithelial high affinity glutamate transporter, system Xag), member 1 | NM_004170    |
| 93  | A_32_P231568  | Hs.129136 | RASEF    | -3.80 | RAS and EF-hand domain containing                                                                       | NM_152573    |
| 94  | A_24_P411749  | Hs.743302 | GPR126   | -3.78 | G protein-coupled receptor 126                                                                          | NM_020455    |
| 95  | A_33_P3231670 | Hs.512767 | RNF208   | -3.78 | ring finger protein 208                                                                                 | NM_031297    |
| 96  | A_23_P3221    | Hs.511251 | SQRDL    | -3.74 | sulfide quinone reductase-like (yeast)                                                                  | NM_021199    |
| 97  | A_24_P105191  | Hs.385956 | HS6ST2   | -3.72 | heparan sulfate 6-O-sulfotransferase 2                                                                  | NM_001077188 |
| 98  | A_24_P313993  | Hs.584744 | CAPS     | -3.71 | calcyphosine                                                                                            | NM_004058    |
| 99  | A_33_P3275707 | Hs.632555 | API3S    | -3.70 | adaptor-related protein complex 1, sigma 3 subunit                                                      | NM_001039569 |
| 100 | A_23_P212469  | Hs.441145 | ENTPD3   | -3.69 | ectonucleoside triphosphate diphosphohydrolase 3                                                        | NM_001248    |

| Rank | ProbeName      | UniGeneID | GeneSymbol   | Fold Change_H358-TGFβ_vs_H358 (log-based) | GeneName                                                                                      | Ref Seq Accession |
|------|----------------|-----------|--------------|-------------------------------------------|-----------------------------------------------------------------------------------------------|-------------------|
| 1    | A_33_P3283833  | Hs.516971 | FOXS1        | 8.27                                      | forkhead box S1                                                                               | NM_004118         |
| 2    | A_23_P99661    | Hs.35125  | ARHGEF40     | 8.11                                      | Rho guanine nucleotide exchange factor (GEF) 40                                               | NM_018071         |
| 3    | A_23_P215060   | Hs.744213 | PODXL        | 7.24                                      | podocalyxin-like                                                                              | NM_001018111      |
| 4    | A_32_P300427   | Hs.119286 | APCDD1L      | 6.71                                      | adenomatosis polyposis coli down-regulated 1-like                                             | NM_153360         |
| 5    | A_33_P3393684  | Hs.647718 | VSIG8        | 6.33                                      | V-set and immunoglobulin domain containing 8                                                  | NM_001013661      |
| 6    | A_33_P3382924  | Hs.111779 | SPARC        | 6.05                                      | secreted protein, acidic, cysteine-rich (osteonectin)                                         | NM_003118         |
| 7    | A_24_P709377   | Hs.656660 | PAX8-AS1     | 6.04                                      | PAX8 antisense RNA 1                                                                          | NR_015377         |
| 8    | A_23_P107775   | Hs.590943 | TMEM190      | 6.02                                      | transmembrane protein 190                                                                     | NM_139172         |
| 9    | A_33_P3215640  | Hs.25391  | PI16         | 5.97                                      | peptidase inhibitor 16                                                                        | NM_153370         |
| 10   | A_23_P43197    | Hs.65425  | CALB1        | 5.86                                      | calbindin 1, 28kDa                                                                            | NM_004929         |
| 11   | A_33_P3268304  | Hs.469881 | LIMS2        | 5.86                                      | LIM and senescent cell antigen-like domains 2                                                 | NM_001161404      |
| 12   | A_23_P357104   | Hs.412117 | ANXA6        | 5.58                                      | annexin A6                                                                                    | NM_001155         |
| 13   | A_23_P102681   | Hs.280135 | -            | 5.52                                      |                                                                                               |                   |
| 14   | A_23_P66637    | Hs.463412 | SGCA         | 5.49                                      | sarcoglycan, alpha (50kDa dystrophin-associated glycoprotein)                                 | NM_000023         |
| 15   | A_23_P111701   | Hs.83381  | GNGL1        | 5.42                                      | guanine nucleotide binding protein (G protein), gamma 11                                      | NM_004126         |
| 16   | A_24_P158089   | Hs.414795 | SERPINE1     | 5.40                                      | serpin peptidase inhibitor, clade E (nexin, plasminogen activator inhibitor type 1), member 1 | NM_000602         |
| 17   | A_33_P3252286  | Hs.114948 | CRLF1        | 5.36                                      | cytokine receptor-like factor 1                                                               | NM_004750         |
| 18   | A_23_P87013    | Hs.410977 | TAGLN/SIDT2  | 5.33                                      | transgelin                                                                                    | NM_001001522      |
| 19   | A_23_P301304   | Hs.264887 | FGFR1        | 5.28                                      | fibroblast growth factor receptor 1                                                           | NM_023110         |
| 20   | A_24_P687594   | Hs.740619 | LIX1L        | 5.22                                      | Lix1 homolog (mouse)-like                                                                     | NM_153713         |
| 21   | A_33_P3243887  | Hs.467304 | IL11         | 5.06                                      | interleukin 11                                                                                | NM_000641         |
| 22   | A_21_P0012152  | Hs.729646 | APCDD1L-AS1  | 4.96                                      | APCDD1L antisense RNA 1 (head to head)                                                        | NR_034147         |
| 23   | A_23_P87011    | Hs.410977 | TAGLN        | 4.92                                      | transgelin                                                                                    | NM_001001522      |
| 24   | A_23_P96383    | Hs.15154  | SRPX         | 4.90                                      | sushi-repeat containing protein, X-linked                                                     | NM_006307         |
| 25   | A_21_P0010254  |           | XLOC_013952  | 4.89                                      |                                                                                               |                   |
| 26   | A_23_P7144     | Hs.789    | CXCL1        | 4.81                                      | chemokine (C-X-C motif) ligand 1 (melanoma growth stimulating activity, alpha)                | NM_001511         |
| 27   | A_23_P218505   | Hs.154704 | LHB          | 4.78                                      | luteinizing hormone beta polypeptide                                                          | NM_000894         |
| 28   | A_19_P00318759 | Hs.729646 | APCDD1L-AS1  | 4.78                                      | APCDD1L antisense RNA 1 (head to head)                                                        | NR_034147         |
| 29   | A_24_P395814   | Hs.446683 | CGB          | 4.76                                      | chorionic gonadotropin, beta polypeptide                                                      | NM_000737         |
| 30   | A_33_P3331916  | Hs.729493 | LINC00545    | 4.76                                      | long intergenic non-protein coding RNA 545                                                    | NR_103813         |
| 31   | A_23_P110791   | Hs.586219 | CSF1R        | 4.73                                      | colony stimulating factor 1 receptor                                                          | NM_005211         |
| 32   | A_21_P0012150  | Hs.729646 | APCDD1L-AS1  | 4.70                                      | APCDD1L antisense RNA 1 (head to head)                                                        | NR_034147         |
| 33   | A_23_P326319   | Hs.401798 | C16orf45     | 4.69                                      | chromosome 16 open reading frame 45                                                           | NM_033201         |
| 34   | A_21_P0014465  |           | LOC101928173 | 4.68                                      | uncharacterized LOC101928173                                                                  | XR_245039         |
| 35   | A_21_P0000129  | Hs.507755 | DCLK1        | 4.64                                      | doublecortin-like kinase 1                                                                    | NM_001195430      |
| 36   | A_23_P40174    | Hs.297413 | MMP9         | 4.62                                      | matrix metalloproteinase 9 (gelatinase B, 92kDa gelatinase, 92kDa type IV collagenase)        | NM_004994         |
| 37   | A_23_P342744   | Hs.740619 | LIX1L        | 4.61                                      | Lix1 homolog (mouse)-like                                                                     | NM_153713         |
| 38   | A_32_P234145   | Hs.642615 | SHC4         | 4.58                                      | SHC (Src homology 2 domain containing) family, member 4                                       | NM_203349         |
| 39   | A_33_P3304668  | Hs.172928 | COL1A1       | 4.58                                      | collagen, type I, alpha 1                                                                     | NM_000088         |
| 40   | A_23_P66525    | Hs.462270 | HS3ST3A1     | 4.54                                      | heparan sulfate (glucosamine) 3-O-sulfotransferase 3A1                                        | NM_006042         |
| 41   | A_23_P36562    | Hs.505654 | ITGA5        | 4.54                                      | integrin, alpha 5 (fibronectin receptor, alpha polypeptide)                                   | NM_002205         |
| 42   | A_23_P213562   | Hs.482562 | F2R          | 4.54                                      | coagulation factor II (thrombin) receptor                                                     | NM_001992         |
| 43   | A_33_P3256510  | Hs.591586 | KCNK12       | 4.41                                      | potassium channel, subfamily K, member 12                                                     | NM_022055         |
| 44   | A_23_P122216   | Hs.102267 | LOX          | 4.36                                      | lysyl oxidase                                                                                 | NM_002317         |
| 45   | A_33_P3242923  | Hs.325752 | LINC00640    | 4.29                                      | long intergenic non-protein coding RNA 640                                                    | NR_038358         |
| 46   | A_33_P3321432  | Hs.567498 | FAM198B      | 4.28                                      | family with sequence similarity 198, member B                                                 | NM_016613         |
| 47   | A_33_P3640690  | Hs.124503 | ZEB1         | 4.27                                      | zinc finger E-box binding homeobox 1                                                          | NM_001128128      |
| 48   | A_33_P3276703  | Hs.587325 | VEGF         | 4.24                                      | VEGF nerve growth factor inducible                                                            | NM_003378         |
| 49   | A_33_P3374723  | Hs.124503 | ZEB1         | 4.20                                      | zinc finger E-box binding homeobox 1                                                          | NM_001128128      |
| 50   | A_33_P3364741  | Hs.7835   | MRC2         | 4.19                                      | mannose receptor, C type 2                                                                    | NM_006039         |

|     |                |           |              |      |                                                                                                        |              |
|-----|----------------|-----------|--------------|------|--------------------------------------------------------------------------------------------------------|--------------|
| 51  | A_23_P333228   | Hs.170388 | MARCH4       | 4.17 | membrane-associated ring finger (C3HC4) 4, E3 ubiquitin protein ligase                                 | NM_020814    |
| 52  | A_23_P160318   | Hs.368921 | COL16A1      | 4.16 | collagen, type XVI, alpha 1                                                                            | NM_001856    |
| 53  | A_21_P0001902  |           | LOC101928173 | 4.15 | uncharacterized LOC101928173                                                                           | XR_245039    |
| 54  | A_19_P00801885 | Hs.729493 | LINC00545    | 4.15 | long intergenic non-protein coding RNA 545                                                             | NR_103813    |
| 55  | A_23_P423331   | Hs.163642 | NTNG2        | 4.14 | netrin G2                                                                                              | NM_032536    |
| 56  | A_23_P372834   | Hs.76152  | AQP1         | 4.10 | aquaporin 1 (Colton blood group)                                                                       | NM_198098    |
| 57  | A_33_P3233906  | Hs.471783 | RAMP1        | 4.09 | receptor (G protein-coupled) activity modifying protein 1                                              | NM_005855    |
| 58  | A_33_P3357678  | Hs.680983 | LCTL         | 4.04 | lactase-like                                                                                           | NM_207338    |
| 59  | A_23_P369994   | Hs.507755 | DCLK1        | 4.04 | doublecortin-like kinase 1                                                                             | NM_004734    |
| 60  | A_19_P00320067 | Hs.200644 |              | 4.02 |                                                                                                        |              |
| 61  | A_23_P1029     | Hs.389137 | MFAP2        | 4.02 | microfibrillar-associated protein 2                                                                    | NM_017459    |
| 62  | A_23_P103371   | Hs.101807 | AZIN2        | 4.02 | antizyme inhibitor 2                                                                                   | NM_052998    |
| 63  | A_23_P45999    | Hs.132753 | FBXO2        | 4.00 | F-box protein 2                                                                                        | NM_012168    |
| 64  | A_23_P380298   | Hs.90232  | LZTS3        | 3.94 | leucine zipper, putative tumor suppressor family member 3                                              | NM_001282533 |
| 65  | A_24_P402588   | Hs.370549 | BCL11A       | 3.92 | B-cell CLL/lymphoma 11A (zinc finger protein)                                                          | NM_018014    |
| 66  | A_24_P88850    | Hs.527021 | MRAS         | 3.92 | muscle RAS oncogene homolog                                                                            | NM_012219    |
| 67  | A_33_P3316786  | Hs.129452 | DACH1        | 3.92 | dachshund family transcription factor 1                                                                | NM_080759    |
| 68  | A_24_P829183   | Hs.535791 | FLJ32255     | 3.91 | uncharacterized LOC643977                                                                              | NR_104643    |
| 69  | A_23_P50946    | Hs.471783 | RAMP1        | 3.91 | receptor (G protein-coupled) activity modifying protein 1                                              | NM_005855    |
| 70  | A_23_P99642    | Hs.513147 | SLC7A7       | 3.89 | solute carrier family 7 (amino acid transporter light chain, y+L system), member 7                     | NM_001126106 |
| 71  | A_33_P3212274  | Hs.482562 | F2R          | 3.88 | coagulation factor II (thrombin) receptor                                                              |              |
| 72  | A_23_P104471   | Hs.178170 | DUSP13       | 3.86 | dual specificity phosphatase 13                                                                        | NM_001007271 |
| 73  | A_23_P122924   | Hs.583348 | INHBA        | 3.84 | inhibin, beta A                                                                                        | NM_002192    |
| 74  | A_23_P386268   | Hs.24510  | C4orf26      | 3.84 | chromosome 4 open reading frame 26                                                                     | NM_178497    |
| 75  | A_21_P0013960  | Hs.669210 | LOC101930246 | 3.83 | uncharacterized LOC101930246                                                                           | XR_250239    |
| 76  | A_33_P3367830  | Hs.731454 | EFEMP2       | 3.83 | EGF containing fibulin-like extracellular matrix protein 2                                             | NM_016938    |
| 77  | A_21_P0000645  | Hs.729646 | APCDD1L-AS1  | 3.81 | APCDD1L antisense RNA 1 (head to head)                                                                 | NR_034147    |
| 78  | A_33_P3354464  | Hs.65436  | LOXL1        | 3.81 | lysyl oxidase-like 1                                                                                   | NM_005576    |
| 79  | A_32_P75581    | Hs.591870 | BHLHE22      | 3.81 | basic helix-loop-helix family, member e22                                                              | NM_152414    |
| 80  | A_23_P62081    | Hs.156540 | SCG5         | 3.81 | secretogranin V (7B2 protein)                                                                          | NM_003020    |
| 81  | A_23_P17914    | Hs.654800 | PNPLA3       | 3.80 | patatin-like phospholipase domain containing 3                                                         | NM_025225    |
| 82  | A_33_P3263432  | Hs.158237 | ITGA10       | 3.80 | integrin, alpha 10                                                                                     | NM_003637    |
| 83  | A_21_P0000144  | Hs.200101 | LOC100505478 | 3.79 | uncharacterized LOC100505478                                                                           | NM_001199233 |
| 84  | A_19_P00320759 | Hs.535791 | FLJ32255     | 3.78 | uncharacterized LOC643977                                                                              | NR_104643    |
| 85  | A_33_P3330264  | Hs.789    | CXCL1        | 3.75 | chemokine (C-X-C motif) ligand 1 (melanoma growth stimulating activity, alpha)                         | NM_001511    |
| 86  | A_21_P0001634  |           | LOC102723817 | 3.75 | uncharacterized LOC102723817                                                                           | XR_425104    |
| 87  | A_23_P35045    | Hs.389374 | ARHGAP30     | 3.75 | Rho GTPase activating protein 30                                                                       | NM_001025598 |
| 88  | A_23_P384044   | Hs.731723 | CNIH3        | 3.74 | cornichon family AMPA receptor auxiliary protein 3                                                     | NM_152495    |
| 89  | A_23_P360964   | Hs.515490 | DACT3        | 3.72 | dishevelled-binding antagonist of beta-catenin 3                                                       | NM_145056    |
| 90  | A_21_P0001085  | Hs.200644 |              | 3.72 |                                                                                                        |              |
| 91  | A_23_P129856   | Hs.72956  | HIC1         | 3.72 | hypermethylated in cancer 1                                                                            | NM_006497    |
| 92  | A_24_P11462    | Hs.101807 | AZIN2        | 3.70 | antizyme inhibitor 2                                                                                   | NM_052998    |
| 93  | A_23_P58588    | Hs.552087 | SLIT3        | 3.69 | slit homolog 3 (Drosophila)                                                                            | NM_003062    |
| 94  | A_23_P128663   | Hs.159492 | SACS         | 3.69 | sacsin molecular chaperone                                                                             | NM_014363    |
| 95  | A_23_P302005   | Hs.732016 | STON1        | 3.65 | stonin 1                                                                                               | NM_006873    |
| 96  | A_23_P100660   | Hs.532768 | SERPINF1     | 3.65 | serpin peptidase inhibitor, clade F (alpha-2 antiplasmin, pigment epithelium derived factor), member 1 | NM_002615    |
| 97  | A_19_P00322977 | Hs.744176 | LINC-PINT    | 3.63 | long intergenic non-protein coding RNA, p53 induced transcript                                         | NR_109854    |
| 98  | A_21_P0004140  | Hs.741936 | LOC102477328 | 3.60 | uncharacterized LOC102477328                                                                           | NR_105007    |
| 99  | A_33_P3415923  | Hs.179838 | FMNL3        | 3.58 | formin-like 3                                                                                          | NM_175736    |
| 100 | A_21_P0001384  | Hs.250624 | LINC00626    | 3.55 | long intergenic non-protein coding RNA 626                                                             | NR_024160    |

**Supplementary Table S2. No significant alterations in the expression of FGF ligands and receptors after trametinib treatment in NCI-H1792 cells.**

| ProbeName     | UniGeneID | Gene Symbol | GeneName                                      | Ref Seq Accession | Fold change (H1792 trametinib) vs.(H1792 no Trx) | Regulation (H1792 Tramitinib) vs.(H1792 no Trx) |
|---------------|-----------|-------------|-----------------------------------------------|-------------------|--------------------------------------------------|-------------------------------------------------|
| A_23_P372923  | Hs.264887 | FGFR1       | fibroblast growth factor receptor 1           | NM_001174066      | 1.102                                            | down                                            |
| A_23_P301304  | Hs.264887 | FGFR1       | fibroblast growth factor receptor 1           | NM_023110         | 1.077                                            | up                                              |
| A_23_P303145  | Hs.533683 | FGFR2       | fibroblast growth factor receptor 2           |                   | 1.430                                            | down                                            |
| A_23_P202334  | Hs.533683 | FGFR2       | fibroblast growth factor receptor 2           | NM_022970         | 1.063                                            | up                                              |
| A_24_P206624  | Hs.533683 | FGFR2       | fibroblast growth factor receptor 2           | NM_022970         | 1.220                                            | down                                            |
| A_23_P500501  | Hs.1420   | FGFR3       | fibroblast growth factor receptor 3           | NM_000142         | 2.178                                            | up                                              |
| A_23_P213336  | Hs.483635 | FGF1        | fibroblast growth factor 1 (acidic)           | NM_000800         | 1.206                                            | up                                              |
| A_33_P3242136 | Hs.483635 | FGF1        | fibroblast growth factor 1 (acidic)           | NM_001257206      | 1.035                                            | up                                              |
| A_33_P3379886 | Hs.284244 | FGF2        | fibroblast growth factor 2 (basic)            | NM_002006         | 1.423                                            | up                                              |
| A_33_P3419696 | Hs.284244 | FGF2        | fibroblast growth factor 2 (basic)            | NM_002006         | 1.427                                            | up                                              |
| A_33_P3380797 | Hs.37092  | FGF3        | fibroblast growth factor 3                    | NM_005247         | 1.093                                            | up                                              |
| A_24_P355720  | Hs.1755   | FGF4        | fibroblast growth factor 4                    | NM_002007         | 1.664                                            | down                                            |
| A_23_P212800  | Hs.37055  | FGF5        | fibroblast growth factor 5                    | NM_004464         | 1.594                                            | down                                            |
| A_33_P3411907 | Hs.37055  | FGF5        | fibroblast growth factor 5                    | NM_033143         | 1.939                                            | down                                            |
| A_32_P196021  | Hs.567268 | FGF7        | fibroblast growth factor 7                    | NM_002009         | 1.203                                            | down                                            |
| A_33_P3257027 | Hs.567268 | FGF7        | fibroblast growth factor 7                    | NM_002009         | 1.232                                            | up                                              |
| A_23_P46829   | Hs.57710  | FGF8        | fibroblast growth factor 8 (androgen-induced) | NM_033163         | 1.060                                            | down                                            |
| A_33_P3348714 | Hs.111    | FGF9        | fibroblast growth factor 9                    | NM_002010         | 1.204                                            | down                                            |
| A_33_P3348719 | Hs.111    | FGF9        | fibroblast growth factor 9                    | NM_002010         | 1.457                                            | down                                            |
| A_23_P377750  | Hs.664499 | FGF10       | fibroblast growth factor 10                   | NM_004465         | 1.222                                            | down                                            |
| A_24_P334300  | Hs.390250 | FGF12       | fibroblast growth factor 12                   | NM_004113         | 1.178                                            | down                                            |
| A_23_P217319  | Hs.6540   | FGF13       | fibroblast growth factor 13                   | NM_004114         | 1.207                                            | down                                            |
| A_23_P88033   | Hs.508616 | FGF14       | fibroblast growth factor 14                   | NM_175929         | 1.956                                            | down                                            |
| A_23_P429363  | Hs.248192 | FGF17       | fibroblast growth factor 17                   | NM_003867         | 1.225                                            | down                                            |
| A_23_P427587  | Hs.249200 | FGF19       | fibroblast growth factor 19                   | NM_005117         | 1.209                                            | down                                            |
| A_23_P395404  | Hs.199905 | FGF20       | fibroblast growth factor 20                   | NM_019851         | 1.215                                            | down                                            |
| A_33_P3400248 | Hs.199905 | FGF20       | fibroblast growth factor 20                   | NM_019851         | 2.047                                            | up                                              |
| A_23_P101564  | Hs.283015 | FGF21       | fibroblast growth factor 21                   | NM_019113         | 1.117                                            | down                                            |
| A_23_P117095  | Hs.287370 | FGF23       | fibroblast growth factor 23                   | NM_020638         | 1.207                                            | down                                            |

## Supplementary Table S3. Differentially expressed genes by microarray analysis between control and trametinib-treated NCI-H1792 cells.

Down\_100

| Rank | UniGeneID | GeneSymbol   | Fold Change_H1792<br>trametinib_vs_H1972 no<br>treatment (log-based) | GeneName                                                                 | raw<br>(H1792<br>trametinib) | raw<br>(H1792 no<br>Trx) | normalized<br>(H1792<br>trametinib) | normalized<br>(H1792 no<br>Trx) |
|------|-----------|--------------|----------------------------------------------------------------------|--------------------------------------------------------------------------|------------------------------|--------------------------|-------------------------------------|---------------------------------|
| 1    | Hs.326035 | EGR1         | -4.95                                                                | early growth response 1                                                  | 24                           | 739                      | -4.625                              | 0.325                           |
| 2    | Hs.444959 | ACO2         | -4.06                                                                | acyl-CoA oxidase 2, branched chain                                       | 18                           | 294                      | -4.062                              | 0.000                           |
| 3    | Hs.657859 | XLOC_014512  | -3.73                                                                |                                                                          | 19                           | 248                      | -0.508                              | 3.219                           |
| 4    | Hs.298654 | DUSP6        | -3.71                                                                | dual specificity phosphatase 6                                           | 251                          | 3260                     | -3.454                              | 0.253                           |
| 5    |           |              | -3.35                                                                |                                                                          | 161                          | 1631                     | -0.070                              | 3.280                           |
| 6    | Hs.657859 |              | -3.34                                                                |                                                                          | 27                           | 275                      | -0.242                              | 3.102                           |
| 7    | Hs.434878 | TNFRSF6B     | -3.22                                                                | tumor necrosis factor receptor superfamily, member 6b, decoy             | 401                          | 3718                     | 1.370                               | 4.591                           |
| 8    | Hs.695934 | COL13A1      | -3.22                                                                | collagen, type XIII, alpha 1                                             | 74                           | 681                      | -2.391                              | 0.828                           |
| 9    | Hs.434878 | TNFRSF6B     | -3.09                                                                | tumor necrosis factor receptor superfamily, member 6b, decoy             | 115                          | 975                      | 0.999                               | 4.086                           |
| 10   | Hs.602085 | PHLDA1       | -2.92                                                                | pleckstrin homology-like domain, family A, member 1                      | 609                          | 4598                     | -3.004                              | -0.081                          |
| 11   | Hs.491582 | PLAT         | -2.90                                                                | plasminogen activator, tissue                                            | 1800                         | 13395                    | -1.276                              | 1.627                           |
| 12   | Hs.534987 | LOC100506457 | -2.90                                                                | uncharacterized LOC100506457                                             | 19                           | 138                      | -0.869                              | 2.030                           |
| 13   | Hs.159226 | HAS2         | -2.85                                                                | hyaluronan synthase 2                                                    | 33                           | 240                      | 0.386                               | 3.237                           |
| 14   | Hs.689698 | SNORA51      | -2.85                                                                | small nucleolar RNA, H/ACA box 51                                        | 47                           | 339                      | -0.922                              | 1.925                           |
| 15   | Hs.49265  | HHIP         | -2.84                                                                | hedgehog interacting protein                                             | 145                          | 1036                     | 0.395                               | 3.237                           |
| 16   | Hs.155651 | FOXA2        | -2.81                                                                | forkhead box A2                                                          | 27                           | 188                      | -2.145                              | 0.667                           |
| 17   | Hs.434059 | ETV4         | -2.69                                                                | ets variant 4                                                            | 197                          | 1261                     | -1.349                              | 1.339                           |
| 18   | Hs.170388 | MARCH4       | -2.69                                                                | membrane-associated ring finger (C3HC4) 4, E3 ubiquitin protein ligase   | 72                           | 459                      | -1.466                              | 1.221                           |
| 19   | Hs.517617 | MAFF         | -2.67                                                                | v-maf avian musculoaponeurotic fibrosarcoma oncogene homolog F           | 120                          | 756                      | -1.146                              | 1.523                           |
| 20   | Hs.689718 | SNORA30      | -2.66                                                                | small nucleolar RNA, H/ACA box 30                                        | 33                           | 208                      | -0.507                              | 2.151                           |
| 21   | Hs.689635 | SCARNA8      | -2.65                                                                | small Cajal body-specific RNA 8                                          | 74                           | 462                      | 0.000                               | 2.653                           |
| 22   | Hs.507991 | HHIP         | -2.63                                                                | hedgehog interacting protein                                             | 80                           | 492                      | 0.000                               | 2.634                           |
| 23   | Hs.144725 | GRAMD1B      | -2.48                                                                | GRAM domain containing 1B                                                | 28                           | 153                      | 0.543                               | 3.024                           |
| 24   | Hs.101307 | SLC14A1      | -2.47                                                                | solute carrier family 14 (urea transporter), member 1 (Kidd blood group) | 37                           | 203                      | 1.601                               | 4.068                           |
| 25   | Hs.737705 |              | -2.44                                                                |                                                                          | 28                           | 153                      | 0.989                               | 3.431                           |
| 26   | Hs.66     | IL1RL1       | -2.43                                                                | interleukin 1 receptor-like 1                                            | 23                           | 122                      | 0.782                               | 3.210                           |
| 27   | Hs.153952 | NT5E         | -2.40                                                                | 5'-nucleotidase, ecto (CD73)                                             | 218                          | 1141                     | -3.701                              | -1.302                          |
| 28   | Hs.386726 | RGS4         | -2.40                                                                | regulator of G-protein signaling 4                                       | 44                           | 229                      | 0.000                               | 2.396                           |
| 29   | Hs.382212 |              | -2.39                                                                |                                                                          | 3899                         | 20252                    | 2.708                               | 5.093                           |
| 30   | Hs.659987 |              | -2.38                                                                |                                                                          | 40                           | 207                      | -1.676                              | 0.701                           |
| 31   | Hs.658237 | SNORA28      | -2.34                                                                | small nucleolar RNA, H/ACA box 28                                        | 70                           | 353                      | -0.886                              | 1.453                           |
| 32   | Hs.449320 |              | -2.33                                                                |                                                                          | 1772                         | 8870                     | 1.976                               | 4.307                           |
| 33   | Hs.380089 | EPHB6        | -2.32                                                                | EPH receptor B6                                                          | 712                          | 3527                     | 3.419                               | 5.735                           |
| 34   | Hs.498571 | LINC00707    | -2.30                                                                | long intergenic non-protein coding RNA 707                               | 41                           | 204                      | 1.647                               | 3.950                           |
| 35   | Hs.550772 | LINC01204    | -2.26                                                                | long intergenic non-protein coding RNA 1204                              | 27                           | 131                      | -2.421                              | -0.157                          |
| 36   | Hs.507348 | HS3ST1       | -2.25                                                                | heparan sulfate (glucosamine) 3-O-sulfotransferase 1                     | 45                           | 215                      | -3.684                              | -1.432                          |
| 37   | Hs.624    | CXCL8        | -2.21                                                                | chemokine (C-X-C motif) ligand 8                                         | 145                          | 667                      | -0.218                              | 1.992                           |
| 38   | Hs.689694 | SCARNA1      | -2.14                                                                | small Cajal body-specific RNA 1                                          | 41                           | 179                      | -1.591                              | 0.551                           |
| 39   | Hs.270833 | AREG         | -2.13                                                                | amphiregulin                                                             | 41                           | 179                      | -2.865                              | -0.739                          |
| 40   | Hs.270833 | AREG         | -2.12                                                                | amphiregulin                                                             | 102                          | 441                      | -2.870                              | -0.746                          |
| 41   | Hs.647132 | NKX6-3       | -2.12                                                                | NK6 homeobox 3                                                           | 24                           | 102                      | 0.000                               | 2.118                           |
| 42   | Hs.744120 | TRIL         | -2.11                                                                | TLR4 interactor with leucine-rich repeats                                | 34                           | 144                      | 1.747                               | 3.856                           |
| 43   | Hs.9914   | FST          | -2.06                                                                | follicle-stimulating hormone receptor 1                                  | 272                          | 1131                     | 0.795                               | 2.856                           |
| 44   | Hs.689719 | SNORA27      | -2.06                                                                | small nucleolar RNA, H/ACA box 27                                        | 135                          | 556                      | -1.677                              | 0.379                           |
| 45   | Hs.732289 | CREG2        | -2.04                                                                | cellular repressor of E1A-stimulated genes 2                             | 52                           | 212                      | 0.437                               | 2.482                           |
| 46   |           | XLOC_009788  | -2.03                                                                |                                                                          | 29                           | 116                      | -2.595                              | -0.566                          |
| 47   | Hs.22634  | ETV1         | -2.02                                                                | ets variant 1                                                            | 63                           | 255                      | -1.160                              | 0.857                           |
| 48   | Hs.197143 | CMKLR1       | -2.02                                                                | chemokine-like receptor 1                                                | 171                          | 689                      | 2.727                               | 4.743                           |
| 49   | Hs.689724 | SNORA1       | -2.01                                                                | small nucleolar RNA, H/ACA box 1                                         | 115                          | 460                      | -0.232                              | 1.779                           |
| 50   | Hs.22634  | ETV1         | -2.00                                                                | ets variant 1                                                            | 54                           | 213                      | -1.046                              | 0.949                           |

|     |           |              |       |                                                                    |       |       |        |        |
|-----|-----------|--------------|-------|--------------------------------------------------------------------|-------|-------|--------|--------|
| 51  | Hs.270    | CYTIP        | -1.99 | cytohesin 1 interacting protein                                    | 22    | 85    | 0.619  | 2.604  |
| 52  | Hs.642615 | SHC4         | -1.96 | SHC (Src homology 2 domain containing) family, member 4            | 44    | 170   | -0.991 | 0.967  |
| 53  | Hs.9613   | ANGPTL4      | -1.94 | angiopoietin-like 4                                                | 826   | 3160  | 0.000  | 1.944  |
| 54  | Hs.153952 | NT5E         | -1.94 | 5'-nucleotidase, ecto (CD73)                                       | 107   | 407   | -2.630 | -0.695 |
| 55  | Hs.25318  | RAB27B       | -1.93 | RAB27B, member RAS oncogene family                                 | 103   | 391   | -0.340 | 1.595  |
| 56  | Hs.177164 | VSIG1        | -1.93 | V-set and immunoglobulin domain containing 1                       | 21    | 80    | -3.072 | -1.138 |
| 57  | Hs.323308 | SPRY4        | -1.93 | sprouty homolog 4 (Drosophila)                                     | 86    | 327   | -1.717 | 0.214  |
| 58  | Hs.633254 | C14orf23     | -1.92 | chromosome 14 open reading frame 23                                | 79    | 300   | 2.383  | 4.308  |
| 59  | Hs.459538 | ALDH1A3      | -1.92 | aldehyde dehydrogenase 1 family, member A3                         | 8816  | 33239 | -0.187 | 1.736  |
| 60  | Hs.641525 | LOC100289473 | -1.92 | cytoskeleton associated protein 2-like pseudogene                  | 30    | 112   | 0.312  | 2.230  |
| 61  | Hs.279746 | TRPV2        | -1.92 | transient receptor potential cation channel, subfamily V, member 2 | 35    | 130   | -0.398 | 1.519  |
| 62  | Hs.125474 | LPXN         | -1.91 | leupaxin                                                           | 1311  | 4907  | 1.801  | 3.714  |
| 63  | Hs.22634  | ETV1         | -1.91 | ets variant 1                                                      | 335   | 1249  | -1.128 | 0.782  |
| 64  | Hs.710069 | LOC100130938 | -1.90 | uncharacterized LOC100130938                                       | 46    | 170   | -2.663 | -0.764 |
| 65  | Hs.731723 | CNIH3        | -1.89 | cornichon family AMPA receptor auxiliary protein 3                 | 859   | 3164  | 0.501  | 2.391  |
| 66  | Hs.567047 | LOC101928413 | -1.89 | uncharacterized LOC101928413                                       | 32    | 116   | -1.981 | -0.094 |
| 67  | Hs.710069 | LOC100130938 | -1.88 | uncharacterized LOC100130938                                       | 107   | 391   | -2.639 | -0.754 |
| 68  | Hs.693446 | SNORA38B     | -1.88 | small nucleolar RNA, H/ACA box 38B                                 | 38    | 138   | -0.503 | 1.378  |
| 69  | Hs.740645 | CHD6         | -1.88 | chromodomain helicase DNA binding protein 6                        | 24    | 88    | -1.027 | 0.854  |
| 70  |           | XLOC_012847  | -1.86 |                                                                    | 118   | 425   | 0.000  | 1.858  |
| 71  | Hs.451802 |              | -1.85 |                                                                    | 19    | 70    | 1.241  | 3.088  |
| 72  | Hs.23735  | KCNF1        | -1.84 | potassium voltage-gated channel, subfamily F, member 1             | 29    | 103   | -0.905 | 0.936  |
| 73  | Hs.129673 | SNORA67      | -1.83 | small nucleolar RNA, H/ACA box 67                                  | 1818  | 6437  | 0.000  | 1.833  |
| 74  | Hs.162963 | ANTXR2       | -1.83 | anthrax toxin receptor 2                                           | 62    | 221   | -1.029 | 0.803  |
| 75  | Hs.710069 | LOC100130938 | -1.83 | uncharacterized LOC100130938                                       | 77    | 270   | -2.679 | -0.853 |
| 76  | Hs.719042 | EMP1         | -1.81 | epithelial membrane protein 1                                      | 11257 | 39294 | -0.581 | 1.231  |
| 77  | Hs.149545 |              | -1.80 |                                                                    | 67    | 232   | 0.063  | 1.866  |
| 78  | Hs.498571 | LINC00707    | -1.80 | long intergenic non-protein coding RNA 707                         | 249   | 865   | 3.225  | 5.028  |
| 79  | Hs.689720 | SNORA23      | -1.79 | small nucleolar RNA, H/ACA box 23                                  | 124   | 427   | -0.516 | 1.278  |
| 80  | Hs.745521 | SNORA6       | -1.79 | small nucleolar RNA, H/ACA box 6                                   | 272   | 936   | -0.074 | 1.720  |
| 81  | Hs.25318  | RAB27B       | -1.78 | RAB27B, member RAS oncogene family                                 | 423   | 1447  | -0.163 | 1.619  |
| 82  | Hs.558645 | ANKRD30BP2   | -1.78 | ankyrin repeat domain 30B pseudogene 2                             | 26    | 88    | -1.556 | 0.223  |
| 83  |           | SCARNA14     | -1.77 | small Cajal body-specific RNA 14                                   | 193   | 655   | 0.235  | 2.009  |
| 84  | Hs.633254 | C14orf23     | -1.76 | chromosome 14 open reading frame 23                                | 266   | 898   | 3.216  | 4.978  |
| 85  | Hs.149545 | LOC100507420 | -1.76 | uncharacterized LOC100507420                                       | 260   | 877   | 0.112  | 1.872  |
| 86  | Hs.668122 | LOC100506178 | -1.75 | uncharacterized LOC100506178                                       | 29    | 96    | -0.831 | 0.919  |
| 87  | Hs.162963 | ANTXR2       | -1.75 | anthrax toxin receptor 2                                           | 205   | 684   | -1.270 | 0.479  |
| 88  | Hs.633254 | C14orf23     | -1.74 | chromosome 14 open reading frame 23                                | 500   | 1665  | 3.307  | 5.051  |
| 89  | Hs.98288  | AQPEP        | -1.74 | laeverin                                                           | 149   | 493   | 2.093  | 3.829  |
| 90  | Hs.684893 | SNORA74A     | -1.72 | small nucleolar RNA, H/ACA box 74A                                 | 29    | 93    | -0.438 | 1.280  |
| 91  |           |              | -1.71 |                                                                    | 670   | 2176  | -2.247 | -0.539 |
| 92  | Hs.434828 | HES7         | -1.70 | hes family bHLH transcription factor 7                             | 20    | 66    | -0.964 | 0.739  |
| 93  | Hs.98288  | AQPEP        | -1.70 | laeverin                                                           | 1139  | 3669  | 3.266  | 4.962  |
| 94  | Hs.713717 | FUT8-AS1     | -1.70 | FUT8 antisense RNA 1                                               | 124   | 401   | -1.934 | -0.238 |
| 95  | Hs.632352 | ANKRD20A5P   | -1.69 | ankyrin repeat domain 20 family, member A5, pseudogene             | 19    | 62    | -0.148 | 1.547  |
| 96  | Hs.523848 | MYEOV        | -1.69 | myeloma overexpressed                                              | 1713  | 5507  | -0.746 | 0.947  |
| 97  | Hs.693283 | SCARNA18     | -1.69 | small Cajal body-specific RNA 18                                   | 515   | 1651  | -0.808 | 0.880  |
| 98  | Hs.567236 | SHROOM2      | -1.69 | shroom family member 2                                             | 490   | 1568  | 1.051  | 2.738  |
| 99  | Hs.668122 | LOC100506178 | -1.67 | uncharacterized LOC100506178                                       | 35    | 110   | -1.301 | 0.370  |
| 100 | Hs.505924 | HMGA2        | -1.66 | high mobility group AT-hook 2                                      | 280   | 879   | -1.657 | 0.000  |



## Up\_100

| Rank | UniGeneID | GeneSymbol  | Fold Change_H1792<br>trametinib_vs_H1972 no<br>treatment (log-based) | GeneName                                                                           | raw<br>(H1792<br>trametinib) | raw<br>(H1792 no<br>Trx) | normalized<br>(H1792<br>trametinib) | normalized<br>(H1792 no<br>Trx) |
|------|-----------|-------------|----------------------------------------------------------------------|------------------------------------------------------------------------------------|------------------------------|--------------------------|-------------------------------------|---------------------------------|
| 1    | Hs.465929 | CNN1        | 5.578                                                                | calponin 1, basic, smooth muscle                                                   | 2495                         | 52                       | 4.496                               | -1.082                          |
| 2    | Hs.516105 | ACTG2       | 4.401                                                                | actin, gamma 2, smooth muscle, enteric                                             | 1259                         | 59                       | 3.791                               | -0.610                          |
| 3    | Hs.591104 | BMF         | 4.194                                                                | Bcl2 modifying factor                                                              | 982                          | 53                       | 1.513                               | -2.682                          |
| 4    | Hs.410977 | TAGLN       | 4.191                                                                | transgelin                                                                         | 1083                         | 59                       | 2.026                               | -2.165                          |
| 5    | Hs.410977 | TAGLN       | 3.787                                                                | transgelin                                                                         | 1771                         | 128                      | 1.872                               | -1.916                          |
| 6    | Hs.219140 | NPPB        | 3.500                                                                | natriuretic peptide B                                                              | 354                          | 31                       | 3.994                               | 0.493                           |
| 7    | Hs.529860 | LINC00963   | 3.351                                                                | long intergenic non-protein coding RNA 963                                         | 6945                         | 677                      | 2.514                               | -0.838                          |
| 8    | Hs.943    | IL32        | 3.288                                                                | interleukin 32                                                                     | 2311                         | 235                      | 2.574                               | -0.714                          |
| 9    | Hs.104672 | FILIP1L     | 3.238                                                                | filamin A interacting protein 1-like                                               | 724                          | 76                       | 2.847                               | -0.390                          |
| 10   | Hs.943    | IL32        | 3.137                                                                | interleukin 32                                                                     | 1207                         | 136                      | 2.282                               | -0.855                          |
| 11   | Hs.349204 | SOST        | 3.102                                                                | sclerostin                                                                         | 872                          | 101                      | 3.102                               | 0.000                           |
| 12   | Hs.513463 | NUPR1       | 3.083                                                                | nuclear protein, transcriptional regulator, 1                                      | 1523                         | 179                      | 3.803                               | 0.720                           |
| 13   | Hs.463652 | LOC645638   | 3.079                                                                | WDMN1-like pseudogene                                                              | 597                          | 70                       | 2.776                               | -0.303                          |
| 14   | Hs.469881 | LIMS2       | 3.004                                                                | LIM and senescent cell antigen-like domains 2                                      | 233                          | 29                       | 1.337                               | -1.667                          |
| 15   | Hs.64746  | CLIC3       | 2.957                                                                | chloride intracellular channel 3                                                   | 475                          | 61                       | -0.522                              | -3.479                          |
| 16   | Hs.334629 | SLN         | 2.923                                                                | sarcolipin                                                                         | 222                          | 29                       | 1.995                               | -0.928                          |
| 17   | Hs.744068 | ANXA8L1     | 2.842                                                                | annexin A8-like 1                                                                  | 709                          | 98                       | 0.000                               | -2.842                          |
| 18   | Hs.591645 | COL4A4      | 2.813                                                                | collagen, type IV, alpha 4                                                         | 212                          | 30                       | 2.001                               | -0.812                          |
| 19   | Hs.463652 | LOC645638   | 2.810                                                                | WDMN1-like pseudogene                                                              | 404                          | 57                       | 2.743                               | -0.067                          |
| 20   | Hs.644105 | CD24        | 2.744                                                                | CD24 molecule                                                                      | 1866                         | 277                      | -0.833                              | -3.576                          |
| 21   | Hs.529571 | RBP1        | 2.728                                                                | retinol binding protein 1, cellular                                                | 795                          | 119                      | 0.000                               | -2.728                          |
| 22   | Hs.162016 | SULF2       | 2.721                                                                | sulfatase 2                                                                        | 784                          | 118                      | 4.327                               | 1.606                           |
| 23   | Hs.40098  | GREM1       | 2.718                                                                | gremlin 1, DAN family BMP antagonist                                               | 2974                         | 449                      | 4.544                               | 1.825                           |
| 24   | Hs.40098  | GREM1       | 2.695                                                                | gremlin 1, DAN family BMP antagonist                                               | 832                          | 128                      | 5.232                               | 2.537                           |
| 25   | Hs.655519 | SYNPO2      | 2.655                                                                | synaptopodin 2                                                                     | 180                          | 28                       | 1.521                               | -1.134                          |
| 26   | Hs.587558 | NCF2        | 2.640                                                                | neutrophil cytosolic factor 2                                                      | 769                          | 123                      | 1.163                               | -1.478                          |
| 27   | Hs.471751 | ACKR3       | 2.614                                                                | atypical chemokine receptor 3                                                      | 10537                        | 1712                     | 2.614                               | 0.000                           |
| 28   | Hs.448497 | PODNL1      | 2.601                                                                | podocan-like 1                                                                     | 315                          | 52                       | 2.940                               | 0.340                           |
| 29   | Hs.112242 | C15orf48    | 2.600                                                                | chromosome 15 open reading frame 48                                                | 4080                         | 669                      | 0.000                               | -2.600                          |
| 30   | Hs.516971 | FOXS1       | 2.543                                                                | forkhead box S1                                                                    | 1393                         | 238                      | 1.172                               | -1.370                          |
| 31   | Hs.120949 | CD36        | 2.315                                                                | CD36 molecule (thrombospondin receptor)                                            | 371                          | 74                       | 3.677                               | 1.362                           |
| 32   | Hs.514451 | SSTR2       | 2.310                                                                | somatostatin receptor 2                                                            | 234                          | 47                       | 3.629                               | 1.318                           |
| 33   | Hs.459088 | CEMP1       | 2.263                                                                | cell migration inducing protein, hyaluronan binding                                | 519                          | 107                      | 0.945                               | -1.318                          |
| 34   | Hs.592145 | WISP2       | 2.213                                                                | WNT1 inducible signaling pathway protein 2                                         | 1297                         | 278                      | 3.028                               | 0.815                           |
| 35   | Hs.666723 | C1QTNF1-AS1 | 2.171                                                                | C1QTNF1 antisense RNA 1                                                            | 257                          | 57                       | 2.701                               | 0.530                           |
| 36   | Hs.224698 | PROC        | 2.151                                                                | protein C (inactivator of coagulation factors Va and VIIIa)                        | 505                          | 113                      | 1.201                               | -0.950                          |
| 37   | Hs.531251 | TRAF1       | 2.144                                                                | TNF receptor-associated factor 1                                                   | 193                          | 43                       | 0.951                               | -1.193                          |
| 38   | Hs.75535  | MYL2        | 2.138                                                                | myosin, light chain 2, regulatory, cardiac, slow                                   | 126                          | 29                       | 0.923                               | -1.215                          |
| 39   | Hs.647971 | PDE5A       | 2.126                                                                | phosphodiesterase 5A, cGMP-specific                                                | 3568                         | 813                      | 2.126                               | 0.000                           |
| 40   | Hs.513147 | SLC7A7      | 2.091                                                                | solute carrier family 7 (amino acid transporter light chain, y+L system), member 7 | 167                          | 39                       | 1.052                               | -1.039                          |
| 41   | Hs.567498 | FAM198B     | 2.086                                                                | family with sequence similarity 198, member B                                      | 1955                         | 458                      | 1.003                               | -1.083                          |
| 42   | Hs.529053 | C3          | 2.047                                                                | complement component 3                                                             | 199                          | 48                       | 1.009                               | -1.038                          |
| 43   | Hs.266616 | ZNF608      | 2.029                                                                | zinc finger protein 608                                                            | 154                          | 37                       | 0.390                               | -1.639                          |
| 44   | Hs.365706 | MGP         | 2.011                                                                | matrix Gla protein                                                                 | 9199                         | 2268                     | 3.950                               | 1.939                           |
| 45   | Hs.365706 | MGP         | 2.000                                                                | matrix Gla protein                                                                 | 4592                         | 1142                     | 3.834                               | 1.834                           |
| 46   | Hs.504687 | MYL9        | 2.000                                                                | myosin, light chain 9, regulatory                                                  | 6356                         | 1580                     | 2.095                               | 0.095                           |
| 47   | Hs.591127 | RASGRP1     | 1.994                                                                | RAS guanyl releasing protein 1 (calcium and DAG-regulated)                         | 236                          | 59                       | 2.110                               | 0.116                           |
| 48   | Hs.172928 | COL1A1      | 1.994                                                                | collagen, type I, alpha 1                                                          | 40626                        | 10143                    | 2.700                               | 0.707                           |
| 49   | Hs.69771  | CFB         | 1.993                                                                | complement factor B                                                                | 200                          | 50                       | 2.017                               | 0.024                           |
| 50   | Hs.201398 | C1QTNF1     | 1.965                                                                | C1q and tumor necrosis factor related protein 1                                    | 497                          | 127                      | 4.137                               | 2.173                           |

|     |           |              |       |                                                                                                        |       |      |        |        |
|-----|-----------|--------------|-------|--------------------------------------------------------------------------------------------------------|-------|------|--------|--------|
| 51  | Hs.654775 | DNM3         | 1.963 | dynamin 3                                                                                              | 181   | 46   | -1.648 | -3.611 |
| 52  | Hs.591683 | DCLK2        | 1.963 | doublecortin-like kinase 2                                                                             | 2778  | 708  | 3.971  | 2.008  |
| 53  | Hs.124940 | RND1         | 1.933 | Rho family GTPase 1                                                                                    | 236   | 61   | 2.603  | 0.670  |
| 54  | Hs.660996 | USP30-AS1    | 1.931 | USP30 antisense RNA 1                                                                                  | 108   | 28   | 1.800  | -0.132 |
| 55  | Hs.143811 | ODAM         | 1.928 | odontogenic, ameloblast associated                                                                     | 137   | 36   | 2.951  | 1.024  |
| 56  | Hs.137007 | KLHDC7B      | 1.924 | kelch domain containing 7B                                                                             | 182   | 48   | 3.872  | 1.948  |
| 57  | Hs.156540 | SCG5         | 1.910 | secretogranin V (7B2 protein)                                                                          | 424   | 112  | 0.926  | -0.984 |
| 58  | Hs.558865 | CES1         | 1.870 | carboxylesterase 1                                                                                     | 660   | 180  | 4.692  | 2.821  |
| 59  | Hs.518921 | NPNT         | 1.867 | nephronectin                                                                                           | 999   | 272  | 1.950  | 0.082  |
| 60  | Hs.224698 | PROC         | 1.844 | protein C (inactivator of coagulation factors Va and VIIIa)                                            | 1056  | 293  | 0.808  | -1.036 |
| 61  |           | LOC102723834 | 1.833 | uncharacterized LOC102723834                                                                           | 562   | 157  | 2.168  | 0.335  |
| 62  | Hs.86447  | TNFRSF9      | 1.799 | tumor necrosis factor receptor superfamily, member 9                                                   | 315   | 90   | 1.507  | -0.292 |
| 63  | Hs.558865 | CES1         | 1.794 | carboxylesterase 1                                                                                     | 6293  | 1804 | 5.857  | 4.063  |
| 64  | Hs.1027   | RRAD         | 1.793 | Ras-related associated with diabetes                                                                   | 4794  | 1376 | 1.793  | 0.000  |
| 65  | Hs.634554 |              | 1.786 |                                                                                                        | 324   | 93   | 2.103  | 0.317  |
| 66  | Hs.592128 | CDRT1        | 1.786 | CMT1A duplicated region transcript 1                                                                   | 106   | 31   | 0.886  | -0.900 |
| 67  | Hs.44278  | RAB17        | 1.745 | RAB17, member RAS oncogene family                                                                      | 107   | 32   | -2.352 | -4.096 |
| 68  | Hs.200644 |              | 1.740 |                                                                                                        | 103   | 31   | 0.610  | -1.130 |
| 69  | Hs.532768 | SERPINF1     | 1.735 | serpin peptidase inhibitor, clade F (alpha-2 antiplasmin, pigment epithelium derived factor), member 1 | 156   | 47   | 0.739  | -0.997 |
| 70  | Hs.146186 | SIM2         | 1.731 | single-minded family bHLH transcription factor 2                                                       | 87    | 26   | 2.771  | 1.040  |
| 71  | Hs.519024 | IGFN1        | 1.726 | immunoglobulin-like and fibronectin type III domain containing 1                                       | 205   | 62   | 2.429  | 0.703  |
| 72  | Hs.591683 | DCLK2        | 1.708 | doublecortin-like kinase 2                                                                             | 176   | 54   | 2.688  | 0.980  |
| 73  | Hs.442619 | MSC          | 1.690 | musculin                                                                                               | 4112  | 1267 | 5.998  | 4.308  |
| 74  | Hs.631804 | CATSPER3     | 1.690 | cation channel, sperm associated 3                                                                     | 125   | 38   | 0.642  | -1.048 |
| 75  |           | XLOC_004874  | 1.689 |                                                                                                        | 83    | 26   | 0.711  | -0.979 |
| 76  | Hs.48950  | DACT1        | 1.682 | dishevelled-binding antagonist of beta-catenin 1                                                       | 888   | 275  | 3.747  | 2.065  |
| 77  | Hs.659104 | RNF150       | 1.671 | ring finger protein 150                                                                                | 124   | 39   | 0.502  | -1.169 |
| 78  | Hs.435228 | SYNPO        | 1.664 | synaptopodin                                                                                           | 4663  | 1464 | 2.801  | 1.137  |
| 79  | Hs.513779 | CRISPLD2     | 1.641 | cysteine-rich secretory protein LCCL domain containing 2                                               | 134   | 43   | 1.641  | 0.000  |
| 80  | Hs.558865 | CES1         | 1.633 | carboxylesterase 1                                                                                     | 93    | 30   | 3.244  | 1.611  |
| 81  | Hs.741750 | IL4I1        | 1.616 | interleukin 4 induced 1                                                                                | 296   | 96   | 0.000  | -1.616 |
| 82  | Hs.502876 | RHOB         | 1.589 | ras homolog family member B                                                                            | 931   | 308  | 0.162  | -1.428 |
| 83  | Hs.41707  | HSPB3        | 1.575 | heat shock 27kDa protein 3                                                                             | 26449 | 8825 | 5.909  | 4.334  |
| 84  | Hs.525626 | PACS2        | 1.551 | phosphofurin acidic cluster sorting protein 2                                                          | 200   | 68   | -1.103 | -2.653 |
| 85  | Hs.36053  | NREP         | 1.537 | neuronal regeneration related protein                                                                  | 276   | 95   | 0.000  | -1.537 |
| 86  | Hs.458355 | C1S          | 1.533 | complement component 1, s subcomponent                                                                 | 17317 | 5948 | 4.593  | 3.060  |
| 87  | Hs.696346 | SYT15        | 1.524 | synaptotagmin XV                                                                                       | 159   | 55   | 0.139  | -1.384 |
| 88  | Hs.555934 | SPINK4       | 1.516 | serine peptidase inhibitor, Kazal type 4                                                               | 130   | 45   | 1.675  | 0.159  |
| 89  | Hs.458355 | C1S          | 1.505 | complement component 1, s subcomponent                                                                 | 544   | 191  | 3.744  | 2.239  |
| 90  | Hs.275775 | SEPP1        | 1.501 | selenoprotein P, plasma, 1                                                                             | 1951  | 685  | 2.423  | 0.922  |
| 91  | Hs.406475 | LUM          | 1.495 | lumican                                                                                                | 6970  | 2458 | 1.658  | 0.163  |
| 92  | Hs.200644 |              | 1.470 |                                                                                                        | 731   | 262  | 0.401  | -1.069 |
| 93  | Hs.744937 | RABGAP1L     | 1.457 | RAB GTPase activating protein 1-like                                                                   | 450   | 163  | 0.649  | -0.808 |
| 94  | Hs.364739 | LOC102724927 | 1.454 | uncharacterized LOC102724927                                                                           | 120   | 43   | -0.079 | -1.532 |
| 95  | Hs.502876 | RHOB         | 1.453 | ras homolog family member B                                                                            | 1582  | 574  | 0.181  | -1.272 |
| 96  | Hs.58877  | HMCN1        | 1.452 | hemicentin 1                                                                                           | 1818  | 661  | 1.962  | 0.509  |
| 97  | Hs.93675  | C10orf10     | 1.452 | chromosome 10 open reading frame 10                                                                    | 445   | 162  | 1.270  | -0.182 |
| 98  | Hs.516036 | TRIM54       | 1.452 | tripartite motif containing 54                                                                         | 174   | 63   | 0.384  | -1.067 |
| 99  | Hs.99004  | MURC         | 1.441 | muscle-related coiled-coil protein                                                                     | 1293  | 473  | 2.255  | 0.814  |
| 100 | Hs.2681   | GAST         | 1.440 | gastrin                                                                                                | 63    | 23   | 1.132  | -0.307 |

Supplementary Table S4. Mutational status of cell lines used in this study

|             | KRAS   | CDKN2A  | CTNNB1 | PIK3CA   | PTEN | RB1    | STK11           | TP53                 | NF1     | NF2 |
|-------------|--------|---------|--------|----------|------|--------|-----------------|----------------------|---------|-----|
| Epithelial  |        |         |        |          |      |        |                 |                      |         |     |
| NCI-H358    | p.G12C | WT      | p.T75A | WT       | WT   | WT     | WT              | WT                   | WT      | WT  |
| NCI-H1573   | p.G12A | WT      | WT     | WT       | WT   | WT     | p.S216F         | p.R248L              | WT      | WT  |
| SW900       | p.G12V | WT      | WT     | WT       | WT   | WT     | WT              | p.Q167*              | WT      | WT  |
| LU65        | p.G12C | p.G135G | WT     | WT       | WT   | p.S82* | c.583_600del193 | p.E11Q, p.T125T      | p.H310H | WT  |
| RERF-LC-AD2 | p.G12V | WT      | WT     | WT       | WT   | WT     | WT              | p.A159V              | WT      | WT  |
| Mesenchymal |        |         |        |          |      |        |                 |                      |         |     |
| A549        | p.G12S | del     | WT     | WT       | WT   | WT     | p.Q37*          | WT                   | WT      | WT  |
| Calu-1      | p.G12C | WT      | WT     | WT       | WT   | WT     | WT              | del                  | WT      | WT  |
| Calu-6      | p.Q61K | del     | WT     | WT       | WT   | WT     | WT              | p.R196*              | WT      | WT  |
| HCC2108     | p.Q61H | WT      | WT     | WT       | WT   | WT     | p.E223K         | p.G154V              | WT      | WT  |
| LU99        | p.G12C | del     | WT     | p.T1025A | WT   | WT     | WT              | WT                   | WT      | WT  |
| NCI-H1792   | p.G12C | p.W110* | WT     | WT       | WT   | WT     | WT              | c.672+1G>A in intron | WT      | WT  |
| NCI-H2030   | p.G12C | WT      | WT     | WT       | WT   | WT     | p.E317*         | p.G262V              | WT      | WT  |
| NCI-H23     | p.G12C | WT      | WT     | WT       | WT   | WT     | p.W332*         | p.M246I              | WT      | WT  |
| NCI-H460    | p.Q61H | del     | WT     | p.E545K  | WT   | WT     | p.Q37*          | WT                   | WT      | WT  |
| SK-LU-1     | p.G12D | del     | WT     | WT       | WT   | WT     | WT              | p.H193R              | WT      | WT  |
| SW1573      | p.G12C | del     | p.S33F | p.K111E  | WT   | WT     | WT              | WT                   | WT      | WT  |

---

Supplementary Table S5: Details of the antibodies

---

|                                 | Company                  | Catalogue # |
|---------------------------------|--------------------------|-------------|
| FGFR1                           | Cell signaling           | 9740        |
| phospho-EGFR (Tyr1068)          | Cell signaling           | 3777        |
| EGFR                            | R&D systems              | AF231       |
| phospho-HER2 (Tyr1221/1222)     | Cell signaling           | 2243        |
| HER2                            | Cell signaling           | 4290        |
| phospho-HER3 (Tyr1289)          | Cell signaling           | 4791        |
| HER3                            | Cell signaling           | 12708       |
| phospho-HER4(Tyr1284)           | Cell signaling           | 4757        |
| HER4                            | Cell signaling           | 4795        |
| IGFR                            | Cell signaling           | 9750        |
| phospho-IRS1 (Ser612)           | Cell signaling           | 3203        |
| IRS1                            | Merck Millipore          | 05-1085     |
| phospho-MET (Tyr1234/1235)      | Cell signaling           | 3077        |
| MET                             | Cell signaling           | 3127        |
| phospho-PDGFR $\alpha$ (Tyr754) | Cell signaling           | 2992        |
| PDGFR $\alpha$                  | Cell signaling           | 5241        |
| phospho-FRS2 $\alpha$ (Tyr436)  | Cell signaling           | 3861        |
| FRS2                            | Santa Cruz Biotechnology | sc-8318     |
| phospho-AXL(Tyr702)             | Cell signaling           | 5724        |
| AXL                             | Cell signaling           | 8661        |
| E-cadherin                      | Cell signaling           | 3195        |
| Vimentin                        | Cell signaling           | 5741        |

|                         |                          |          |
|-------------------------|--------------------------|----------|
| phospho-AKT (Ser473)    | Cell signaling           | 4060     |
| AKT                     | Cell signaling           | 9272     |
| phospho-ERK             | R&D systems              | AF1018   |
| ERK                     | R&D systems              | AF1576   |
| phospho-S6 (Ser235/236) | Cell signaling           | 4858     |
| S6                      | Cell signaling           | 2217     |
| Cleaved PARP (Asp214)   | Cell signaling           | 5625     |
| $\beta$ -actin          | Cell signaling           | 4970     |
| ZEB1                    | Cell signaling           | 3396     |
| SPRY4                   | Santa Cruz Biotechnology | sc-30051 |
| p85                     | Merck Millipore          | ABS-233  |
| DUSP6                   | Abcam                    | ab76310  |

---
